# Supplementary material for: Catching up? The educational mobility of migrants’ and natives’ children in Europe
Source: PubMed Central journal article supplement (PMC5448400; doi:10.1080/00036846.2016.1267843), 2016-12-30
Supplement: raec_a_1267843_sm1840.pdf [file raec_a_1267843_sm1840.pdf]

# Online Appendix

## Catching-up: The educational mobility of migrants' and natives' children in Europe\*

Doris Oberdabernig<sup>†1</sup> and Alyssa Schneebaum<sup>‡2</sup>

<sup>1</sup>World Trade Institute (WTI), University of Bern

<sup>2</sup>Department of Economics, Vienna University of Economics and Business

October 2016

### Abstract

Migrants into European countries are often less educated than European natives. We analyze whether migrants' children are more or less likely than natives' children to achieve upward educational mobility across generations, and study differences in the factors which contribute to differences in mobility for the two groups. We find that migrants' descendants are more often upwardly mobile (and less often downwardly mobile) than their native peers in the majority of countries studied, and show that the main factor contributing to these patterns is the education level of parents. Although a lower parental education means that their children are less likely to access the same amount of human, social, and financial capital as children of more highly educated parents, migrants' descendants over the last two generations were able to make significant progress in reducing education gaps with natives.

**JEL Classifications:** J62, I21, J11

**Key Words:** Intergenerational Mobility; Immigrants; Educational Attainment; Europe

---

\*The authors are grateful for helpful comments from Octavio Fernández-Amador and some people at some conferences. Sophie Augustin provided excellent research assistance.

<sup>†</sup>[doris.oberdabernig@wti.org](mailto:doris.oberdabernig@wti.org). Hallerstrasse 6, 3012 Bern, Switzerland. Tel.: +41 (0)31 631 3270

<sup>‡</sup>Corresponding Author. [alyssa.schneebaum@wu.ac.at](mailto:alyssa.schneebaum@wu.ac.at). Welthandelsplatz 1, 1020 Vienna, Austria. Tel.: +43 (0)1 31336 5936

# Contents

|                                                            |           |
|------------------------------------------------------------|-----------|
| <b>A Upward mobility</b>                                   | <b>3</b>  |
| A.1 Descriptive statistics . . . . .                       | 3         |
| A.2 Logit coefficients . . . . .                           | 3         |
| A.3 Logit results - marginal effects . . . . .             | 6         |
| A.4 Gelman statistics . . . . .                            | 9         |
| <b>B Downward mobility</b>                                 | <b>11</b> |
| B.1 Descriptive statistics . . . . .                       | 11        |
| B.2 Logit coefficients . . . . .                           | 11        |
| B.3 Logit results - marginal effects . . . . .             | 14        |
| B.4 Gelman statistics . . . . .                            | 17        |
| <b>C Upward mobility conditional on parental education</b> | <b>19</b> |
| C.1 Descriptive statistics . . . . .                       | 19        |
| C.2 Logit coefficients . . . . .                           | 19        |
| C.3 Logit results - marginal effects . . . . .             | 22        |
| C.4 Gelman statistics . . . . .                            | 25        |
| <b>D Two classes upward mobility</b>                       | <b>27</b> |
| D.1 Descriptive statistics . . . . .                       | 27        |
| D.2 Logit coefficients . . . . .                           | 27        |
| D.3 Logit results - marginal effects . . . . .             | 30        |
| D.4 Gelman statistics . . . . .                            | 33        |
| <b>E Selection</b>                                         | <b>35</b> |
| E.1 Dropped observations . . . . .                         | 35        |
| E.2 Mobility patterns of dropped observations . . . . .    | 36        |

# A Upward mobility

## A.1 Descriptive statistics

Table A.1: Descriptive statistics of all variables for the sample used for upward mobility

|                            | AT    | BE    | CH    | CZ    | DE    | EE    | FR    | HR    | LU    | LV    | UK    |
|----------------------------|-------|-------|-------|-------|-------|-------|-------|-------|-------|-------|-------|
| <i>Natives' children</i>   |       |       |       |       |       |       |       |       |       |       |       |
| Birth year                 | 1966  | 1966  | 1965  | 1966  | 1965  | 1966  | 1966  | 1965  | 1965  | 1967  | 1966  |
| Cohort 50s (d)             | 0.27  | 0.31  | 0.32  | 0.32  | 0.33  | 0.29  | 0.31  | 0.35  | 0.35  | 0.28  | 0.30  |
| Cohort 60s (d)             | 0.39  | 0.32  | 0.38  | 0.27  | 0.38  | 0.35  | 0.33  | 0.32  | 0.32  | 0.32  | 0.35  |
| Male (d)                   | 0.48  | 0.49  | 0.46  | 0.43  | 0.47  | 0.49  | 0.46  | 0.51  | 0.49  | 0.45  | 0.45  |
| Fathers' age at birth      | 30.36 | 29.98 | 31.56 | 28.14 | 29.51 | 30.59 | 29.62 | 29.47 | 31.04 | 29.76 | 29.98 |
| Mothers' age at birth      | 26.96 | 27.49 | 28.31 | 24.94 | 26.71 | 27.65 | 26.87 | 26.00 | 27.67 | 27.37 | 27.14 |
| Age diff. of parents       | 4.26  | 3.23  | 4.11  | 3.63  | 3.58  | 4.34  | 3.59  | 4.19  | 4.17  | 3.91  | 3.62  |
| Mother out of labor f. (d) | 0.44  | 0.54  | 0.46  | 0.08  | 0.48  | 0.08  | 0.44  | 0.56  | 0.64  | 0.08  | 0.26  |
| Mothers' education         | 1.36  | 1.24  | 1.50  | 1.24  | 1.65  | 1.52  | 1.07  | 1.19  | 1.29  | 1.48  | 1.09  |
| Fathers' education         | 1.56  | 1.28  | 1.75  | 1.25  | 1.86  | 1.48  | 1.08  | 1.40  | 1.51  | 1.41  | 1.28  |
| Highest parental educ.     | 1.61  | 1.38  | 1.82  | 1.37  | 1.90  | 1.65  | 1.14  | 1.42  | 1.56  | 1.56  | 1.33  |
| # of adults in hh          | 2.76  | 2.38  | 2.54  | 2.17  | 2.30  | 2.29  | 2.44  | 2.63  | 2.61  | 2.17  | 2.30  |
| # of children in hh        | 2.54  | 2.53  | 2.53  | 2.24  | 2.22  | 2.35  | 1.62  | 2.22  | 2.35  | 2.37  | 2.29  |
| Financial situation        | 3.63  | 4.25  | 4.25  | 3.99  | 3.95  | 3.93  | 3.86  | 3.59  | 4.16  | 4.04  | 3.93  |
| <i>Migrants' children</i>  |       |       |       |       |       |       |       |       |       |       |       |
| Birth year                 | 1971  | 1971  | 1969  | 1961  | 1965  | 1966  | 1970  | 1968  | 1972  | 1966  | 1968  |
| Cohort 50s (d)             | 0.22  | 0.20  | 0.12  | 0.54  | 0.33  | 0.29  | 0.17  | 0.23  | 0.08  | 0.33  | 0.18  |
| Cohort 60s (d)             | 0.16  | 0.22  | 0.38  | 0.30  | 0.40  | 0.36  | 0.32  | 0.34  | 0.28  | 0.32  | 0.41  |
| Male (d)                   | 0.44  | 0.51  | 0.46  | 0.39  | 0.46  | 0.52  | 0.51  | 0.49  | 0.52  | 0.52  | 0.40  |
| Fathers' age at birth      | 30.87 | 31.94 | 31.13 | 28.71 | 31.35 | 29.05 | 32.48 | 30.55 | 30.72 | 29.81 | 31.77 |
| Mothers' age at birth      | 27.74 | 27.51 | 27.63 | 26.26 | 28.03 | 27.59 | 27.54 | 27.40 | 27.36 | 28.00 | 28.43 |
| Age diff. of parents       | 4.15  | 5.21  | 4.37  | 3.65  | 4.10  | 3.32  | 5.37  | 4.00  | 4.32  | 3.22  | 4.53  |
| Mother out of labor f. (d) | 0.34  | 0.69  | 0.31  | 0.15  | 0.50  | 0.06  | 0.58  | 0.66  | 0.50  | 0.05  | 0.33  |
| Mothers' education         | 1.16  | 0.91  | 1.09  | 1.07  | 1.39  | 1.56  | 0.84  | 1.12  | 1.12  | 1.46  | 0.99  |
| Fathers' education         | 1.34  | 1.01  | 1.35  | 1.07  | 1.61  | 1.53  | 0.92  | 1.34  | 1.20  | 1.46  | 1.16  |
| Highest parental educ.     | 1.46  | 1.08  | 1.42  | 1.14  | 1.65  | 1.67  | 0.99  | 1.37  | 1.27  | 1.58  | 1.19  |
| # of adults in hh          | 2.66  | 2.51  | 2.40  | 2.32  | 2.38  | 2.28  | 2.95  | 2.89  | 2.42  | 2.15  | 2.72  |
| # of children in hh        | 2.31  | 3.06  | 1.95  | 3.06  | 2.20  | 1.95  | 2.27  | 2.43  | 2.51  | 2.32  | 2.89  |
| Financial situation        | 3.72  | 3.82  | 4.21  | 3.78  | 3.90  | 3.95  | 3.71  | 3.49  | 4.07  | 4.06  | 3.88  |

Age difference refers to the absolute age difference between the parents. Mother out of labor force is an indicator whether the respondents' mother was in or out of the labor force when the respondent was 14. # of persons in the household refers to the number of adults and children, respectively, in the household in which the respondents lived when they were 14 years old. Financial situation refers to the financial situation of the household in which the respondents lived when they were 14 years old. A detailed definition of variables can be found in the variable table A.3.

## A.2 Logit coefficients

Table A.2: Logit result for natives' children

|                               | Austria               | Belgium               | Switzerland           | Czech Rep.            | Germany               | Estonia               | France                 | Croatia               | Luxemb.               | Latvia                | UK                    |
|-------------------------------|-----------------------|-----------------------|-----------------------|-----------------------|-----------------------|-----------------------|------------------------|-----------------------|-----------------------|-----------------------|-----------------------|
| Intercept                     | 26.592<br>(0.229)     | 4.947<br>(0.832)      | 28.598<br>(0.245)     | -59.731 **<br>(0.012) | 37.069 **<br>(0.033)  | 46.024 *<br>(0.097)   | -65.142 ***<br>(0.000) | -7.068<br>(0.732)     | -28.190<br>(0.279)    | -33.953<br>(0.146)    | -41.350 *<br>(0.084)  |
| Birth year                    | -0.013<br>(0.244)     | -0.003<br>(0.783)     | -0.014<br>(0.252)     | 0.033 ***<br>(0.006)  | -0.018 **<br>(0.039)  | -0.022<br>(0.120)     | 0.033 ***<br>(0.000)   | 0.003<br>(0.762)      | 0.013<br>(0.326)      | 0.018<br>(0.135)      | 0.022 *<br>(0.070)    |
| Cohort 50s (d)                | -0.523 **<br>(0.043)  | -0.645 **<br>(0.017)  | -0.516 *<br>(0.063)   | 0.171<br>(0.545)      | -0.377 *<br>(0.059)   | 0.300<br>(0.356)      | -0.246<br>(0.235)      | -0.024<br>(0.925)     | -0.421<br>(0.179)     | 1.168 ***<br>(0.000)  | -0.229<br>(0.417)     |
| Cohort 60s (d)                | -0.128<br>(0.444)     | -0.070<br>(0.694)     | -0.280<br>(0.105)     | 0.311 *<br>(0.080)    | -0.196<br>(0.116)     | 0.377 *<br>(0.073)    | 0.010<br>(0.942)       | 0.211<br>(0.201)      | -0.361 *<br>(0.071)   | 0.804 ***<br>(0.000)  | -0.016<br>(0.934)     |
| Male (d)                      | 0.516 ***<br>(0.000)  | -0.215 ***<br>(0.007) | 0.794 ***<br>(0.000)  | 0.284 ***<br>(0.000)  | 0.444 ***<br>(0.000)  | -0.942 ***<br>(0.000) | 0.133 **<br>(0.024)    | 0.326 ***<br>(0.000)  | 0.071<br>(0.000)      | -1.037 ***<br>(0.000) | 0.010<br>(0.913)      |
| Mother's age at birth         | 0.126 **<br>(0.041)   | 0.107<br>(0.106)      | 0.163 **<br>(0.022)   | 0.044<br>(0.566)      | 0.104 **<br>(0.049)   | 0.026<br>(0.723)      | 0.108 *<br>(0.053)     | -0.006<br>(0.920)     | 0.187 **<br>(0.021)   | 0.092<br>(0.147)      | 0.172 **<br>(0.011)   |
| Mother's age at b., sq (/100) | -0.236 **<br>(0.023)  | -0.195 *<br>(0.062)   | -0.235 **<br>(0.040)  | -0.107<br>(0.432)     | -0.205 **<br>(0.019)  | -0.033<br>(0.774)     | -0.208 **<br>(0.026)   | -0.030<br>(0.764)     | -0.297 **<br>(0.029)  | -0.146<br>(0.158)     | -0.258 **<br>(0.018)  |
| Father's age at birth         | 0.043<br>(0.352)      | 0.102 *<br>(0.054)    | 0.114 **<br>(0.049)   | 0.009<br>(0.876)      | 0.067<br>(0.101)      | 0.026<br>(0.613)      | 0.023<br>(0.590)       | 0.120 ***<br>(0.010)  | 0.085<br>(0.176)      | 0.021<br>(0.660)      | -0.045<br>(0.399)     |
| Father's age at b., sq (/100) | -0.019<br>(0.775)     | -0.103<br>(0.173)     | -0.159 *<br>(0.051)   | 0.039<br>(0.664)      | -0.022<br>(0.713)     | -0.030<br>(0.683)     | -0.001<br>(0.991)      | -0.117 *<br>(0.086)   | -0.085<br>(0.362)     | -0.002<br>(0.977)     | 0.091<br>(0.234)      |
| Age difference parents        | -0.020<br>(0.228)     | -0.046 **<br>(0.016)  | 0.003<br>(0.888)      | -0.013<br>(0.574)     | -0.045 ***<br>(0.007) | -0.022<br>(0.235)     | -0.023<br>(0.104)      | -0.033 *<br>(0.053)   | -0.017<br>(0.462)     | -0.033 **<br>(0.023)  | -0.029<br>(0.149)     |
| Mother out of labor f. (d)    | 0.014<br>(0.866)      | -0.190 **<br>(0.033)  | 0.085<br>(0.320)      | -0.529 ***<br>(0.000) | -0.021<br>(0.754)     | 0.093<br>(0.658)      | -0.051<br>(0.457)      | 0.033<br>(0.693)      | 0.094<br>(0.325)      | 0.162<br>(0.333)      | -0.076<br>(0.427)     |
| Mother's education            | 0.554 ***<br>(0.000)  | 0.376 **<br>(0.010)   | 0.377 ***<br>(0.000)  | 0.644 ***<br>(0.000)  | 0.317 ***<br>(0.000)  | 0.982 ***<br>(0.000)  | 0.420 ***<br>(0.004)   | 0.868 ***<br>(0.000)  | 0.611 ***<br>(0.000)  | 0.907 ***<br>(0.000)  | 0.111<br>(0.436)      |
| Father's education            | 0.335 *<br>(0.078)    | 0.362 **<br>(0.021)   | 0.210<br>(0.176)      | 0.624 ***<br>(0.000)  | 0.048<br>(0.735)      | 0.383 ***<br>(0.009)  | 0.290 *<br>(0.051)     | 0.795 ***<br>(0.002)  | 0.500 **<br>(0.023)   | 0.613 ***<br>(0.000)  | -0.040<br>(0.848)     |
| Highest parental educ.        | -3.369 ***<br>(0.000) | -1.669 ***<br>(0.000) | -3.516 ***<br>(0.000) | -4.425 ***<br>(0.000) | -2.776 ***<br>(0.000) | -3.650 ***<br>(0.000) | -1.596 ***<br>(0.000)  | -2.668 ***<br>(0.000) | -2.810 ***<br>(0.000) | -2.777 ***<br>(0.000) | -1.636 ***<br>(0.000) |
| # of children in hh           | -0.046<br>(0.111)     | -0.077 **<br>(0.006)  | -0.069 **<br>(0.041)  | -0.267 ***<br>(0.000) | -0.051 *<br>(0.053)   | -0.098 **<br>(0.012)  | -0.120 ***<br>(0.000)  | -0.108 ***<br>(0.001) | -0.035<br>(0.324)     | -0.152 ***<br>(0.000) | -0.137 ***<br>(0.000) |
| # of adults in hh             | -0.067 *<br>(0.053)   | -0.083 *<br>(0.050)   | -0.166 ***<br>(0.000) | -0.169 ***<br>(0.007) | -0.043<br>(0.171)     | -0.136 *<br>(0.057)   | -0.155 ***<br>(0.000)  | 0.019<br>(0.574)      | -0.096 **<br>(0.023)  | -0.149 **<br>(0.048)  | -0.313 ***<br>(0.000) |
| Financial situation           | 0.209 *<br>(0.063)    | 0.226 **<br>(0.050)   | -0.020<br>(0.915)     | 0.160<br>(0.219)      | -0.010<br>(0.963)     | 0.168<br>(0.470)      | 0.238 ***<br>(0.008)   | 0.429 ***<br>(0.000)  | 0.109<br>(0.423)      | 0.339 **<br>(0.028)   | 0.301 **<br>(0.019)   |
| Finance * highest educ.       | -0.039<br>(0.567)     | -0.022<br>(0.776)     | 0.025<br>(0.807)      | -0.054<br>(0.534)     | 0.018<br>(0.875)      | 0.009<br>(0.946)      | -0.103<br>(0.170)      | -0.222 ***<br>(0.001) | 0.071<br>(0.437)      | -0.161 *<br>(0.077)   | -0.163 *<br>(0.055)   |
| N                             | 3903                  | 2911                  | 3455                  | 5415                  | 5361                  | 2378                  | 6466                   | 4024                  | 2503                  | 3059                  | 3466                  |

The table reports logit coefficients. p-value based on equation (3) in parenthesis. \*\*\*, \*\*, [\*] signify significance of the effects at the 1%, (5%), [10%] level, respectively, based on equation (4). (d) indicates that the variable is a dummy variable. For dummy variables the reported effect refers to a discrete change of the variable from 0 to 1.

Table A.3: Logit result for migrants' children

|                               | Austria              | Belgium                 | Switzerland           | Czech Rep.          | Germany               | Estonia                | France               | Croatia              | Luxemb.                | Latvia                | UK                   |
|-------------------------------|----------------------|-------------------------|-----------------------|---------------------|-----------------------|------------------------|----------------------|----------------------|------------------------|-----------------------|----------------------|
| Intercept                     | 360.785 *<br>(0.058) | -501.110 ***<br>(0.003) | 70.506<br>(0.503)     | 256.015<br>(0.200)  | -96.544<br>(0.542)    | -279.350 **<br>(0.018) | 32.063<br>(0.685)    | 77.771<br>(0.413)    | -24.031<br>(0.744)     | 62.755<br>(0.446)     | -245.567<br>(0.492)  |
| Birth year                    | -0.189 *<br>(0.051)  | 0.259 ***<br>(0.003)    | -0.030<br>(0.569)     | -0.129<br>(0.197)   | 0.051<br>(0.521)      | 0.136 **<br>(0.022)    | -0.017<br>(0.669)    | -0.042<br>(0.381)    | 0.015<br>(0.676)       | -0.030<br>(0.475)     | 0.124<br>(0.492)     |
| Cohort 50s (d)                | -3.417<br>(0.158)    | 4.378 **<br>(0.021)     | -0.412<br>(0.741)     | -2.480<br>(0.261)   | 0.878<br>(0.636)      | 2.945 **<br>(0.026)    | -0.290<br>(0.760)    | -0.874<br>(0.466)    | -0.795<br>(0.397)      | 0.023<br>(0.980)      | 0.299<br>(0.939)     |
| Cohort 60s (d)                | 0.100<br>(0.950)     | 2.442 **<br>(0.041)     | -0.280<br>(0.692)     | 0.242<br>(0.860)    | -0.989<br>(0.375)     | 2.165 **<br>(0.010)    | -0.193<br>(0.745)    | 0.327<br>(0.667)     | 0.059<br>(0.914)       | 0.210<br>(0.742)      | -1.264<br>(0.613)    |
| Male (d)                      | 1.103<br>(0.123)     | -1.676 ***<br>(0.006)   | 1.267 ***<br>(0.003)  | -0.257<br>(0.671)   | 0.091<br>(0.856)      | -1.774 ***<br>(0.000)  | 0.330<br>(0.259)     | 0.184<br>(0.579)     | 0.593 **<br>(0.030)    | -0.963 ***<br>(0.000) | -3.090 **<br>(0.047) |
| Mother's age at birth         | -0.589<br>(0.306)    | 0.588<br>(0.115)        | -0.381<br>(0.339)     | -0.143<br>(0.820)   | 0.882 *<br>(0.061)    | 0.318<br>(0.396)       | 0.059<br>(0.805)     | -0.144<br>(0.685)    | 0.626 **<br>(0.011)    | 0.064<br>(0.745)      | 2.175 **<br>(0.033)  |
| Mother's age at b., sq (/100) | 0.517<br>(0.566)     | -0.777<br>(0.181)       | 0.703<br>(0.304)      | 0.445<br>(0.691)    | -1.127<br>(0.105)     | -0.716<br>(0.267)      | -0.230<br>(0.539)    | 0.205<br>(0.731)     | -1.327 ***<br>(0.002)  | -0.059<br>(0.847)     | -3.375 **<br>(0.024) |
| Father's age at birth         | 1.504 ***<br>(0.006) | -0.139<br>(0.635)       | 0.313<br>(0.338)      | 0.405<br>(0.239)    | 0.100<br>(0.803)      | 0.446<br>(0.116)       | 0.236<br>(0.243)     | 0.509<br>(0.116)     | -0.234<br>(0.225)      | -0.250<br>(0.190)     | -0.960<br>(0.330)    |
| Father's age at b., sq (/100) | -1.516 **<br>(0.045) | 0.010<br>(0.979)        | -0.386<br>(0.441)     | -0.642<br>(0.200)   | -0.453<br>(0.428)     | -0.650<br>(0.158)      | -0.133<br>(0.611)    | -0.615<br>(0.187)    | 0.634 **<br>(0.040)    | 0.399<br>(0.152)      | 1.012<br>(0.401)     |
| Age difference parents        | -0.489 **<br>(0.042) | 0.048<br>(0.744)        | -0.130<br>(0.144)     | 0.074<br>(0.592)    | 0.011<br>(0.936)      | -0.024<br>(0.740)      | -0.101<br>(0.262)    | -0.055<br>(0.565)    | -0.067<br>(0.337)      | -0.034<br>(0.522)     | 0.640 *<br>(0.077)   |
| Mother out of labor f. (d)    | -0.673<br>(0.454)    | -0.366<br>(0.600)       | -0.289<br>(0.498)     | -0.284<br>(0.738)   | -0.658<br>(0.228)     | -0.175<br>(0.845)      | -0.831 **<br>(0.014) | -0.290<br>(0.530)    | 0.170<br>(0.585)       | 0.250<br>(0.685)      | -2.195<br>(0.160)    |
| Mother's education            | -0.191<br>(0.853)    | 1.110<br>(0.154)        | 0.813 **<br>(0.038)   | -1.669<br>(0.357)   | 0.004<br>(0.994)      | -0.579<br>(0.324)      | 0.735 *<br>(0.056)   | 1.059 *<br>(0.051)   | 0.696<br>(0.252)       | 1.654 ***<br>(0.005)  | -0.029<br>(0.987)    |
| Father's education            | -1.326<br>(0.324)    | 2.123 **<br>(0.049)     | -0.198<br>(0.775)     | 0.117<br>(0.957)    | 1.545<br>(0.230)      | 0.373<br>(0.559)       | 0.407<br>(0.472)     | 2.829 *<br>(0.085)   | 1.657 **<br>(0.011)    | 0.494<br>(0.280)      | 2.810<br>(0.401)     |
| Highest parental educ.        | -2.374<br>(0.401)    | -12.902 ***<br>(0.002)  | -6.431 ***<br>(0.002) | -0.992<br>(0.802)   | -9.404 ***<br>(0.010) | 0.931<br>(0.699)       | -2.598 *<br>(0.054)  | -4.280 **<br>(0.027) | -12.017 ***<br>(0.000) | -2.729 *<br>(0.081)   | -9.448<br>(0.112)    |
| # of children in hh           | 0.276<br>(0.431)     | -0.562 ***<br>(0.002)   | -0.008<br>(0.974)     | -0.179<br>(0.270)   | -0.121<br>(0.634)     | -0.644 ***<br>(0.005)  | 0.094<br>(0.243)     | -0.012<br>(0.927)    | -0.246 **<br>(0.028)   | -0.047<br>(0.680)     | 0.538<br>(0.472)     |
| # of adults in hh             | -0.535<br>(0.109)    | -0.496 **<br>(0.049)    | -0.898 ***<br>(0.003) | -0.671 *<br>(0.059) | -0.029<br>(0.935)     | -0.283<br>(0.395)      | -0.129<br>(0.121)    | -0.256 *<br>(0.056)  | 0.004<br>(0.980)       | -0.052<br>(0.827)     | 0.192<br>(0.718)     |
| Financial situation           | 0.247<br>(0.771)     | -1.375<br>(0.115)       | -0.335<br>(0.647)     | 0.160<br>(0.854)    | -2.107<br>(0.138)     | 2.691 **<br>(0.019)    | 0.086<br>(0.802)     | 0.495<br>(0.121)     | -1.987 ***<br>(0.000)  | 0.808<br>(0.128)      | 0.305<br>(0.863)     |
| Finance * highest educ.       | -0.042<br>(0.944)    | 1.386 *<br>(0.072)      | 0.296<br>(0.482)      | -0.379<br>(0.629)   | 0.770<br>(0.295)      | -1.280 **<br>(0.037)   | -0.011<br>(0.970)    | -0.346<br>(0.148)    | 1.791 ***<br>(0.000)   | -0.536<br>(0.115)     | 0.092<br>(0.933)     |
| N                             | 87                   | 140                     | 281                   | 103                 | 153                   | 239                    | 420                  | 219                  | 332                    | 409                   | 116                  |

The table reports logit coefficients. p-value based on equation (3) in parenthesis. \*\*\*, \*\*, [\*] signify significance of the effects at the 1%, (5%), [10%] level, respectively, based on equation (4). (d) indicates that the variable is a dummy variable. For dummy variables the reported effect refers to a discrete change of the variable from 0 to 1.

### A.3 Logit results - marginal effects

Table A.4: Logit result for natives' children (marginal effects)

|                               | Austria               | Belgium               | Switzerland           | Czech Rep.            | Germany               | Estonia               | France                | Croatia               | Luxemb.               | Latvia                   | UK                    |
|-------------------------------|-----------------------|-----------------------|-----------------------|-----------------------|-----------------------|-----------------------|-----------------------|-----------------------|-----------------------|--------------------------|-----------------------|
| Birth year                    | -0.002<br>(0.243)     | -0.001<br>(0.782)     | -0.002<br>(0.252)     | 0.004 ***<br>(0.006)  | -0.004 **<br>(0.039)  | -0.004<br>(0.120)     | 0.005 ***<br>(0.000)  | 0.001<br>(0.762)      | 0.003<br>(0.326)      | 0.003<br>(0.135)         | 0.003 *<br>(0.069)    |
| Cohort 50s (d)                | -0.080 **<br>(0.037)  | -0.137 **<br>(0.015)  | -0.086 *<br>(0.055)   | 0.021<br>(0.541)      | -0.076 *<br>(0.052)   | 0.053<br>(0.353)      | -0.041<br>(0.238)     | -0.004<br>(0.931)     | -0.082<br>(0.172)     | 0.211 ***<br>(0.140 ***) | -0.037<br>(0.412)     |
| Cohort 60s (d)                | -0.020<br>(0.445)     | -0.015<br>(0.691)     | -0.048<br>(0.102)     | 0.036 *<br>(0.078)    | -0.040<br>(0.113)     | 0.063 *<br>(0.073)    | 0.001<br>(0.949)      | 0.039<br>(0.201)      | -0.071 *<br>(0.067)   | 0.140 ***<br>(0.000)     | -0.003<br>(0.926)     |
| Male (d)                      | 0.083 ***<br>(0.000)  | -0.045 ***<br>(0.007) | 0.141 ***<br>(0.000)  | 0.033 ***<br>(0.000)  | 0.093 ***<br>(0.000)  | -0.159 ***<br>(0.000) | 0.021 **<br>(0.023)   | 0.061 ***<br>(0.000)  | 0.074 ***<br>(0.000)  | -0.182 ***<br>(0.000)    | 0.001<br>(0.915)      |
| Mother's age at birth         | 0.020 **<br>(0.041)   | 0.022<br>(0.106)      | 0.029 **<br>(0.022)   | 0.005<br>(0.566)      | 0.022 **<br>(0.049)   | 0.004<br>(0.723)      | 0.017 *<br>(0.053)    | -0.001<br>(0.920)     | 0.038 **<br>(0.020)   | 0.016<br>(0.147)         | 0.027 **<br>(0.011)   |
| Mother's age at b., sq (/100) | -0.038 **<br>(0.023)  | -0.041 *<br>(0.061)   | -0.041 **<br>(0.040)  | -0.013<br>(0.432)     | -0.043 **<br>(0.018)  | -0.005<br>(0.775)     | -0.033 **<br>(0.027)  | -0.006<br>(0.764)     | -0.060 **<br>(0.029)  | -0.025<br>(0.158)        | -0.040 **<br>(0.018)  |
| Father's age at birth         | 0.007<br>(0.352)      | 0.021 *<br>(0.054)    | 0.020 **<br>(0.049)   | 0.001<br>(0.876)      | 0.014<br>(0.101)      | 0.004<br>(0.612)      | 0.004<br>(0.590)      | 0.022 ***<br>(0.010)  | 0.017<br>(0.176)      | 0.004<br>(0.660)         | -0.007<br>(0.399)     |
| Father's age at b., sq (/100) | -0.003<br>(0.775)     | -0.022<br>(0.172)     | -0.028 *<br>(0.051)   | 0.005<br>(0.665)      | -0.005<br>(0.712)     | -0.005<br>(0.684)     | -0.000<br>(0.991)     | -0.022 *<br>(0.086)   | -0.017<br>(0.362)     | -0.000<br>(0.978)        | 0.014<br>(0.234)      |
| Age difference parents        | -0.003<br>(0.228)     | -0.010 **<br>(0.016)  | 0.000<br>(0.889)      | -0.002<br>(0.573)     | -0.009 ***<br>(0.007) | -0.004<br>(0.235)     | -0.004<br>(0.103)     | -0.006 *<br>(0.053)   | -0.003<br>(0.462)     | -0.006 **<br>(0.023)     | -0.005<br>(0.148)     |
| Mother out of labor f. (d)    | 0.002<br>(0.865)      | -0.040 **<br>(0.033)  | 0.015<br>(0.320)      | -0.064 ***<br>(0.000) | -0.004<br>(0.755)     | 0.016<br>(0.653)      | -0.008<br>(0.456)     | 0.006<br>(0.690)      | 0.019<br>(0.325)      | 0.028<br>(0.331)         | -0.012<br>(0.425)     |
| Mother's education            | 0.089 ***<br>(0.000)  | 0.079 ***<br>(0.010)  | 0.066 ***<br>(0.000)  | 0.076 ***<br>(0.000)  | 0.066 ***<br>(0.000)  | 0.164 ***<br>(0.000)  | 0.067 ***<br>(0.004)  | 0.162 ***<br>(0.000)  | 0.123 ***<br>(0.000)  | 0.158 ***<br>(0.000)     | 0.017<br>(0.438)      |
| Father's education            | 0.054 *<br>(0.078)    | 0.076 **<br>(0.020)   | 0.037<br>(0.176)      | 0.074 ***<br>(0.000)  | 0.010<br>(0.735)      | 0.064 ***<br>(0.009)  | 0.046 *<br>(0.050)    | 0.148 ***<br>(0.002)  | 0.100 **<br>(0.023)   | 0.106 ***<br>(0.000)     | -0.006<br>(0.847)     |
| Highest parental educ.        | -0.541 ***<br>(0.000) | -0.349 ***<br>(0.000) | -0.617 ***<br>(0.000) | -0.523 ***<br>(0.000) | -0.579 ***<br>(0.000) | -0.609 ***<br>(0.000) | -0.255 ***<br>(0.000) | -0.497 ***<br>(0.000) | -0.564 ***<br>(0.000) | -0.482 ***<br>(0.000)    | -0.254 ***<br>(0.000) |
| # of children in hh           | -0.007<br>(0.111)     | -0.016 ***<br>(0.005) | -0.012 **<br>(0.042)  | -0.032 ***<br>(0.000) | -0.011 *<br>(0.053)   | -0.016 **<br>(0.012)  | -0.019 ***<br>(0.000) | -0.020 ***<br>(0.001) | -0.007<br>(0.324)     | -0.026 ***<br>(0.000)    | -0.021 ***<br>(0.000) |
| # of adults in hh             | -0.011 *<br>(0.053)   | -0.017 **<br>(0.049)  | -0.029 ***<br>(0.000) | -0.020 ***<br>(0.007) | -0.009<br>(0.171)     | -0.023 *<br>(0.058)   | -0.025 ***<br>(0.000) | 0.003<br>(0.575)      | -0.019 **<br>(0.023)  | -0.026 **<br>(0.047)     | -0.049 ***<br>(0.000) |
| Financial situation           | 0.034 *<br>(0.063)    | 0.047 **<br>(0.050)   | -0.004<br>(0.915)     | 0.019<br>(0.219)      | -0.002<br>(0.963)     | 0.028<br>(0.469)      | 0.038 ***<br>(0.008)  | 0.080 ***<br>(0.000)  | 0.022<br>(0.423)      | 0.059 **<br>(0.028)      | 0.047 **<br>(0.019)   |
| Finance * highest educ.       | -0.006<br>(0.567)     | -0.005<br>(0.776)     | 0.004<br>(0.807)      | -0.006<br>(0.534)     | 0.004<br>(0.874)      | 0.001<br>(0.947)      | -0.017<br>(0.171)     | -0.041 ***<br>(0.001) | 0.014<br>(0.437)      | -0.028 *<br>(0.078)      | -0.025 *<br>(0.055)   |
| N                             | 3903                  | 2911                  | 3455                  | 5415                  | 5361                  | 2378                  | 6466                  | 4024                  | 2503                  | 3059                     | 3466                  |

The table reports average marginal effects. The constant term is not shown. p-value based on equation (3) in parenthesis. \*\*\*, (\*\*), [\*] signify significance of the effects at the 1%, (5%), [10%] level, respectively, based on equation (4). (d) indicates that the variable is a dummy variable. For dummy variables the reported effect refers to a discrete change of the variable from 0 to 1.

Table A.5: Logit results for migrants' children (marginal effects)

|                               | Austria              | Belgium               | Switzerland           | Czech Rep.           | Germany               | Estonia               | France                | Croatia              | Luxemb.               | Latvia                | UK                   |
|-------------------------------|----------------------|-----------------------|-----------------------|----------------------|-----------------------|-----------------------|-----------------------|----------------------|-----------------------|-----------------------|----------------------|
| Birth year                    | -0.021 **<br>(0.039) | 0.029 ***<br>(0.001)  | -0.003<br>(0.564)     | -0.016<br>(0.181)    | 0.006<br>(0.523)      | 0.017 **<br>(0.018)   | -0.002<br>(0.672)     | -0.007<br>(0.381)    | 0.002<br>(0.678)      | -0.004<br>(0.476)     | 0.004<br>(0.501)     |
| Cohort 50s (d)                | -0.275 *<br>(0.089)  | 0.300 ***<br>(0.000)  | -0.039<br>(0.739)     | -0.232<br>(0.220)    | 0.103<br>(0.600)      | 0.348 ***<br>(0.006)  | -0.051<br>(0.684)     | -0.136<br>(0.449)    | -0.132<br>(0.369)     | 0.009<br>(0.941)      | -0.013<br>(0.924)    |
| Cohort 60s (d)                | 0.015<br>(0.926)     | 0.214 **<br>(0.012)   | -0.029<br>(0.672)     | 0.019<br>(0.901)     | -0.123<br>(0.356)     | 0.269 ***<br>(0.005)  | -0.027<br>(0.715)     | 0.055<br>(0.655)     | 0.007<br>(0.934)      | 0.032<br>(0.716)      | -0.047<br>(0.590)    |
| Male (d)                      | 0.130<br>(0.120)     | -0.179 ***<br>(0.003) | 0.124 ***<br>(0.002)  | -0.033<br>(0.661)    | 0.011<br>(0.855)      | -0.233 ***<br>(0.000) | 0.040<br>(0.262)      | 0.031<br>(0.580)     | 0.092 **<br>(0.030)   | -0.130 ***<br>(0.000) | -0.105 **<br>(0.026) |
| Mother's age at birth         | -0.067<br>(0.307)    | 0.066<br>(0.111)      | -0.037<br>(0.337)     | -0.018<br>(0.815)    | 0.105 *<br>(0.057)    | 0.040<br>(0.401)      | 0.007<br>(0.809)      | -0.024<br>(0.683)    | 0.095 ***<br>(0.008)  | 0.009<br>(0.745)      | 0.076 **<br>(0.027)  |
| Mother's age at b., sq (/100) | 0.060<br>(0.562)     | -0.087<br>(0.178)     | 0.068<br>(0.300)      | 0.056<br>(0.688)     | -0.135<br>(0.101)     | -0.090<br>(0.269)     | -0.027<br>(0.542)     | 0.035<br>(0.729)     | -0.201 ***<br>(0.001) | -0.008<br>(0.845)     | -0.118 **<br>(0.017) |
| Father's age at birth         | 0.170 ***<br>(0.003) | -0.015<br>(0.636)     | 0.030<br>(0.338)      | 0.049<br>(0.237)     | 0.012<br>(0.810)      | 0.057<br>(0.112)      | 0.028<br>(0.243)      | 0.085<br>(0.111)     | -0.035<br>(0.223)     | -0.034<br>(0.193)     | -0.034<br>(0.335)    |
| Father's age at b., sq (/100) | -0.171 **<br>(0.038) | 0.001<br>(0.980)      | -0.037<br>(0.442)     | -0.078<br>(0.197)    | -0.054<br>(0.432)     | -0.082<br>(0.154)     | -0.016<br>(0.611)     | -0.102<br>(0.184)    | 0.096 **<br>(0.037)   | 0.054<br>(0.155)      | 0.035<br>(0.406)     |
| Age difference parents        | -0.055 **<br>(0.035) | 0.005<br>(0.743)      | -0.013<br>(0.143)     | 0.009<br>(0.588)     | 0.001<br>(0.935)      | -0.003<br>(0.739)     | -0.012<br>(0.259)     | -0.009<br>(0.565)    | -0.010<br>(0.335)     | -0.005<br>(0.519)     | 0.023 *<br>(0.074)   |
| Mother out of labor f. (d)    | -0.070<br>(0.464)    | -0.037<br>(0.616)     | -0.028<br>(0.499)     | -0.043<br>(0.690)    | -0.079<br>(0.229)     | -0.017<br>(0.876)     | -0.096 ***<br>(0.010) | -0.045<br>(0.540)    | 0.025<br>(0.590)      | 0.035<br>(0.674)      | -0.078<br>(0.146)    |
| Mother's education            | -0.022<br>(0.851)    | 0.124<br>(0.146)      | 0.079 **<br>(0.031)   | -0.205<br>(0.359)    | 0.000<br>(0.997)      | -0.074<br>(0.323)     | 0.089 *<br>(0.057)    | 0.176 **<br>(0.046)  | 0.106<br>(0.250)      | 0.221 ***<br>(0.005)  | -0.001<br>(0.983)    |
| Father's education            | -0.150<br>(0.319)    | 0.236 **<br>(0.042)   | -0.019<br>(0.773)     | 0.015<br>(0.955)     | 0.185<br>(0.226)      | 0.047<br>(0.563)      | 0.049<br>(0.472)      | 0.472 *<br>(0.082)   | 0.252 ***<br>(0.010)  | 0.066<br>(0.280)      | 0.100<br>(0.403)     |
| Highest parental educ.        | -0.266<br>(0.406)    | -1.436 ***<br>(0.001) | -0.624 ***<br>(0.001) | -0.120<br>(0.802)    | -1.121 ***<br>(0.007) | 0.118<br>(0.700)      | -0.314 *<br>(0.053)   | -0.713 **<br>(0.023) | -1.824 ***<br>(0.000) | -0.365 *<br>(0.080)   | -0.331<br>(0.103)    |
| \# of children in hh          | 0.031<br>(0.434)     | -0.062 ***<br>(0.000) | -0.001<br>(0.975)     | -0.022<br>(0.262)    | -0.014<br>(0.637)     | -0.081 ***<br>(0.004) | 0.011<br>(0.244)      | -0.002<br>(0.928)    | -0.037 **<br>(0.026)  | -0.006<br>(0.681)     | 0.019<br>(0.489)     |
| \# of adults in hh            | -0.060 *<br>(0.100)  | -0.055 **<br>(0.041)  | -0.087 ***<br>(0.002) | -0.082 **<br>(0.050) | -0.003<br>(0.936)     | -0.035<br>(0.397)     | -0.016<br>(0.122)     | -0.043 **<br>(0.049) | 0.001<br>(0.983)      | -0.007<br>(0.827)     | 0.007<br>(0.723)     |
| Financial situation           | 0.027<br>(0.782)     | -0.153<br>(0.106)     | -0.033<br>(0.647)     | 0.020<br>(0.854)     | -0.251<br>(0.136)     | 0.340 **<br>(0.015)   | 0.010<br>(0.805)      | 0.082<br>(0.118)     | -0.302 ***<br>(0.000) | 0.108<br>(0.129)      | 0.011<br>(0.860)     |
| Finance * highest educ.       | -0.004<br>(0.950)    | 0.154 *<br>(0.062)    | 0.029<br>(0.481)      | -0.046<br>(0.630)    | 0.092<br>(0.296)      | -0.162 **<br>(0.033)  | -0.001<br>(0.973)     | -0.057<br>(0.144)    | 0.272 ***<br>(0.000)  | -0.072<br>(0.114)     | 0.003<br>(0.942)     |
| N                             | 87                   | 140                   | 281                   | 103                  | 153                   | 239                   | 420                   | 219                  | 332                   | 409                   | 116                  |

The table reports average marginal effects. The constant term is not shown. p-value based on equation (3) in parenthesis. \*\*\*, (\*\*), [\*] signify significance of the effects at the 1%, (5%), [10%] level, respectively, based on equation (4). (d) indicates that the variable is a dummy variable. For dummy variables the reported effect refers to a discrete change of the variable from 0 to 1.

## A.4 Gelman statistics

Table A.6: Gelman statistics

|                               | Austria | Belgium | Switzerland | Czech Rep. | Germany | Estonia | France | Croatia | Luxemb. | Latvia | UK   |
|-------------------------------|---------|---------|-------------|------------|---------|---------|--------|---------|---------|--------|------|
| Natives' children             |         |         |             |            |         |         |        |         |         |        |      |
| Intercept                     | 1.00    | 1.00    | 1.00        | 1.00       | 1.00    | 1.00    | 1.00   | 1.00    | 1.00    | 1.00   | 1.00 |
| Birth year                    | 1.00    | 1.00    | 1.00        | 1.00       | 1.00    | 1.00    | 1.00   | 1.00    | 1.00    | 1.00   | 1.00 |
| Cohort 50s (d)                | 1.00    | 1.00    | 1.00        | 1.00       | 1.00    | 1.00    | 1.00   | 1.00    | 1.00    | 1.00   | 1.00 |
| Cohort 60s (d)                | 1.00    | 1.00    | 1.00        | 1.00       | 1.00    | 1.00    | 1.00   | 1.00    | 1.00    | 1.00   | 1.00 |
| Male (d)                      | 1.00    | 1.00    | 1.00        | 1.00       | 1.00    | 1.00    | 1.00   | 1.00    | 1.00    | 1.00   | 1.00 |
| Mother's age at birth         | 1.00    | 1.00    | 1.00        | 1.00       | 1.00    | 1.00    | 1.00   | 1.00    | 1.00    | 1.00   | 1.00 |
| Mother's age at b., sq (/100) | 1.00    | 1.00    | 1.00        | 1.00       | 1.00    | 1.00    | 1.00   | 1.00    | 1.00    | 1.00   | 1.00 |
| Father's age at birth         | 1.00    | 1.00    | 1.00        | 1.00       | 1.00    | 1.00    | 1.00   | 1.00    | 1.00    | 1.00   | 1.00 |
| Father's age at b., sq (/100) | 1.00    | 1.00    | 1.00        | 1.00       | 1.00    | 1.00    | 1.00   | 1.00    | 1.00    | 1.00   | 1.00 |
| Age difference parents        | 1.00    | 1.00    | 1.00        | 1.00       | 1.00    | 1.00    | 1.00   | 1.00    | 1.00    | 1.00   | 1.00 |
| Mother out of labor f. (d)    | 1.00    | 1.00    | 1.00        | 1.00       | 1.00    | 1.00    | 1.00   | 1.00    | 1.00    | 1.00   | 1.00 |
| Mother's education            | 1.00    | 1.00    | 1.00        | 1.00       | 1.00    | 1.00    | 1.00   | 1.00    | 1.00    | 1.00   | 1.00 |
| Father's education            | 1.00    | 1.00    | 1.00        | 1.00       | 1.00    | 1.00    | 1.00   | 1.00    | 1.00    | 1.00   | 1.00 |
| Highest parental educ.        | 1.00    | 1.00    | 1.00        | 1.00       | 1.00    | 1.00    | 1.00   | 1.00    | 1.00    | 1.00   | 1.00 |
| # of children in hh           | 1.00    | 1.00    | 1.00        | 1.00       | 1.00    | 1.00    | 1.00   | 1.00    | 1.00    | 1.00   | 1.00 |
| # of adults in hh             | 1.00    | 1.00    | 1.00        | 1.00       | 1.00    | 1.00    | 1.00   | 1.00    | 1.00    | 1.00   | 1.00 |
| Financial situation           | 1.00    | 1.00    | 1.00        | 1.00       | 1.00    | 1.00    | 1.00   | 1.00    | 1.00    | 1.00   | 1.00 |
| Finance * highest educ.       | 1.00    | 1.00    | 1.00        | 1.00       | 1.00    | 1.00    | 1.00   | 1.00    | 1.00    | 1.00   | 1.00 |
| Migrants' children            |         |         |             |            |         |         |        |         |         |        |      |
| Intercept                     | 1.02    | 1.04    | 1.00        | 1.02       | 1.00    | 1.01    | 1.00   | 1.00    | 1.00    | 1.00   | 1.03 |
| Birth year                    | 1.02    | 1.04    | 1.00        | 1.02       | 1.00    | 1.01    | 1.00   | 1.00    | 1.00    | 1.00   | 1.03 |
| Cohort 50s (d)                | 1.02    | 1.03    | 1.00        | 1.01       | 1.00    | 1.01    | 1.00   | 1.00    | 1.00    | 1.00   | 1.02 |
| Cohort 60s (d)                | 1.01    | 1.02    | 1.00        | 1.01       | 1.00    | 1.01    | 1.00   | 1.00    | 1.00    | 1.00   | 1.01 |
| Male (d)                      | 1.00    | 1.01    | 1.00        | 1.00       | 1.00    | 1.00    | 1.00   | 1.00    | 1.00    | 1.00   | 1.01 |
| Mother's age at birth         | 1.00    | 1.00    | 1.00        | 1.00       | 1.00    | 1.00    | 1.00   | 1.00    | 1.00    | 1.00   | 1.01 |
| Mother's age at b., sq (/100) | 1.00    | 1.00    | 1.00        | 1.00       | 1.00    | 1.00    | 1.00   | 1.00    | 1.00    | 1.00   | 1.01 |
| Father's age at birth         | 1.00    | 1.00    | 1.00        | 1.00       | 1.00    | 1.00    | 1.00   | 1.00    | 1.00    | 1.00   | 1.00 |
| Father's age at b., sq (/100) | 1.00    | 1.00    | 1.00        | 1.00       | 1.00    | 1.00    | 1.00   | 1.00    | 1.00    | 1.00   | 1.00 |
| Age difference parents        | 1.00    | 1.00    | 1.00        | 1.00       | 1.00    | 1.00    | 1.00   | 1.00    | 1.00    | 1.00   | 1.01 |
| Mother out of labor f. (d)    | 1.00    | 1.00    | 1.00        | 1.00       | 1.00    | 1.00    | 1.00   | 1.00    | 1.00    | 1.00   | 1.00 |
| Mother's education            | 1.00    | 1.00    | 1.00        | 1.00       | 1.00    | 1.00    | 1.00   | 1.00    | 1.00    | 1.00   | 1.00 |
| Father's education            | 1.00    | 1.01    | 1.00        | 1.00       | 1.00    | 1.00    | 1.00   | 1.00    | 1.00    | 1.00   | 1.00 |
| Highest parental educ.        | 1.00    | 1.01    | 1.00        | 1.00       | 1.00    | 1.00    | 1.00   | 1.00    | 1.00    | 1.00   | 1.00 |
| # of children in hh           | 1.00    | 1.00    | 1.00        | 1.00       | 1.00    | 1.00    | 1.00   | 1.00    | 1.00    | 1.00   | 1.00 |
| # of adults in hh             | 1.00    | 1.00    | 1.00        | 1.00       | 1.00    | 1.00    | 1.00   | 1.00    | 1.00    | 1.00   | 1.00 |
| Financial situation           | 1.00    | 1.00    | 1.00        | 1.00       | 1.00    | 1.00    | 1.00   | 1.00    | 1.00    | 1.00   | 1.00 |
| Finance * highest educ.       | 1.00    | 1.00    | 1.00        | 1.00       | 1.00    | 1.00    | 1.00   | 1.00    | 1.00    | 1.00   | 1.00 |

## B Downward mobility

### B.1 Descriptive statistics

Table B.1: Descriptive statistics of all variables for the sample used for downward mobility

|                            | AT                        | CH    | DE    | EE    | FR    | HR    | LU    | LV    |
|----------------------------|---------------------------|-------|-------|-------|-------|-------|-------|-------|
|                            | <i>Natives' children</i>  |       |       |       |       |       |       |       |
| Birth year                 | 1966                      | 1966  | 1965  | 1968  | 1967  | 1966  | 1966  | 1968  |
| Cohort 50s (d)             | 0.26                      | 0.30  | 0.30  | 0.25  | 0.28  | 0.34  | 0.33  | 0.25  |
| Cohort 60s (d)             | 0.39                      | 0.37  | 0.38  | 0.33  | 0.31  | 0.31  | 0.32  | 0.31  |
| Male (d)                   | 0.48                      | 0.46  | 0.47  | 0.49  | 0.47  | 0.50  | 0.49  | 0.45  |
| Father's age at birth      | 30.32                     | 31.58 | 29.63 | 30.12 | 29.60 | 29.51 | 31.10 | 29.67 |
| Mother's age at birth      | 26.93                     | 28.39 | 26.85 | 27.40 | 26.96 | 26.00 | 27.78 | 27.36 |
| Age difference parents     | 4.22                      | 4.05  | 3.56  | 4.09  | 3.50  | 4.22  | 4.12  | 3.82  |
| Mother out of labor f. (d) | 0.44                      | 0.47  | 0.44  | 0.07  | 0.42  | 0.53  | 0.63  | 0.08  |
| Mother's education         | 1.46                      | 1.59  | 1.82  | 1.82  | 1.27  | 1.29  | 1.38  | 1.71  |
| Father's education         | 1.77                      | 1.93  | 2.20  | 1.73  | 1.32  | 1.51  | 1.65  | 1.62  |
| Highest parental educ.     | 1.83                      | 2.00  | 2.26  | 1.98  | 1.43  | 1.55  | 1.71  | 1.84  |
| # of adults in hh          | 2.71                      | 2.50  | 2.26  | 2.27  | 2.40  | 2.60  | 2.58  | 2.16  |
| # of children in hh        | 2.51                      | 2.51  | 2.19  | 2.28  | 1.57  | 2.19  | 2.34  | 2.30  |
| Financial situation        | 3.72                      | 4.36  | 4.13  | 4.01  | 3.97  | 3.68  | 4.24  | 4.11  |
|                            | <i>Migrants' children</i> |       |       |       |       |       |       |       |
| Birth year                 | 1970                      | 1969  | 1964  | 1967  | 1970  | 1968  | 1973  | 1966  |
| Cohort 50s (d)             | 0.23                      | 0.13  | 0.34  | 0.26  | 0.18  | 0.24  | 0.08  | 0.31  |
| Cohort 60s (d)             | 0.18                      | 0.38  | 0.38  | 0.35  | 0.31  | 0.32  | 0.27  | 0.31  |
| Male (d)                   | 0.43                      | 0.47  | 0.47  | 0.49  | 0.50  | 0.49  | 0.53  | 0.52  |
| Father's age at birth      | 31.75                     | 31.09 | 31.28 | 29.08 | 32.20 | 30.44 | 30.91 | 29.88 |
| Mother's age at birth      | 28.10                     | 27.63 | 28.07 | 27.68 | 27.70 | 27.20 | 27.37 | 27.95 |
| Age difference parents     | 4.48                      | 4.32  | 3.96  | 3.18  | 4.99  | 4.06  | 4.44  | 3.28  |
| Mother out of labor f. (d) | 0.34                      | 0.33  | 0.46  | 0.05  | 0.54  | 0.62  | 0.51  | 0.05  |
| Mother's education         | 1.32                      | 1.34  | 1.52  | 1.93  | 1.03  | 1.21  | 1.23  | 1.65  |
| Father's education         | 1.63                      | 1.69  | 1.91  | 1.90  | 1.14  | 1.46  | 1.33  | 1.69  |
| Highest parental educ.     | 1.74                      | 1.77  | 1.96  | 2.11  | 1.24  | 1.49  | 1.41  | 1.84  |
| # of adults in hh          | 2.64                      | 2.34  | 2.36  | 2.25  | 2.82  | 2.81  | 2.42  | 2.13  |
| # of children in hh        | 2.28                      | 1.97  | 2.11  | 1.89  | 2.05  | 2.45  | 2.47  | 2.22  |
| Financial situation        | 3.91                      | 4.29  | 3.95  | 4.04  | 3.80  | 3.55  | 4.15  | 4.12  |

Age difference refers to the absolute age difference between the parents. Mother out of labor force is an indicator whether the respondents' mother was in or out of the labor force when the respondent was 14. # of persons in the household refers to the number of adults and children, respectively, in the household in which the respondents lived when they were 14 years old. Financial situation refers to the financial situation of the household in which the respondents lived when they were 14 years old. A detailed definition of variables can be found in the variable table A.3.

### B.2 Logit coefficients

Table B.2: Logit result for natives' children

|                               | Austria               | Switzerland           | Germany                | Estonia                 | France                | Croatia               | Luxemb.               | Latvia                |
|-------------------------------|-----------------------|-----------------------|------------------------|-------------------------|-----------------------|-----------------------|-----------------------|-----------------------|
| Intercept                     | -37.980<br>(0.224)    | -0.145<br>(0.997)     | -64.381 ***<br>(0.002) | -151.049 ***<br>(0.000) | -41.589<br>(0.206)    | 47.676<br>(0.235)     | 16.859<br>(0.640)     | -60.535 **<br>(0.026) |
| Birth year                    | 0.016<br>(0.295)      | -0.004<br>(0.817)     | 0.031 ***<br>(0.003)   | 0.075 ***<br>(0.000)    | 0.018<br>(0.291)      | -0.027<br>(0.190)     | -0.011<br>(0.544)     | 0.028 **<br>(0.041)   |
| Cohort 50s (d)                | 0.628 *<br>(0.094)    | 0.663<br>(0.128)      | 0.527 **<br>(0.032)    | 0.198<br>(0.601)        | 0.940 **<br>(0.023)   | -0.535<br>(0.278)     | 0.638<br>(0.137)      | -0.360<br>(0.299)     |
| Cohort 60s (d)                | 0.069<br>(0.769)      | 0.237<br>(0.390)      | 0.142<br>(0.336)       | -0.029<br>(0.893)       | 0.371<br>(0.153)      | -0.318<br>(0.306)     | 0.178<br>(0.514)      | -0.558 **<br>(0.012)  |
| Male (d)                      | -0.293 **<br>(0.011)  | -0.978 ***<br>(0.000) | -0.360 ***<br>(0.000)  | 0.823 ***<br>(0.000)    | 0.411 ***<br>(0.001)  | 0.111<br>(0.470)      | -0.457 ***<br>(0.000) | 1.170 ***<br>(0.000)  |
| Mother's age at birth         | 0.032<br>(0.696)      | -0.077<br>(0.480)     | -0.080<br>(0.192)      | -0.052<br>(0.523)       | -0.128<br>(0.267)     | -0.326 **<br>(0.015)  | -0.180<br>(0.111)     | -0.049<br>(0.533)     |
| Mother's age at b., sq (/100) | -0.027<br>(0.840)     | 0.142<br>(0.412)      | 0.186 *<br>(0.077)     | 0.106<br>(0.422)        | 0.181<br>(0.360)      | 0.605 **<br>(0.010)   | 0.377 **<br>(0.047)   | 0.078<br>(0.535)      |
| Father's age at birth         | -0.132 *<br>(0.050)   | 0.049<br>(0.599)      | -0.064<br>(0.176)      | -0.208 ***<br>(0.001)   | -0.035<br>(0.722)     | -0.032<br>(0.755)     | -0.162 *<br>(0.067)   | 0.043<br>(0.531)      |
| Father's age at b., sq (/100) | 0.157<br>(0.120)      | -0.108<br>(0.432)     | 0.026<br>(0.709)       | 0.281 ***<br>(0.003)    | 0.060<br>(0.684)      | 0.001<br>(0.993)      | 0.157<br>(0.229)      | -0.088<br>(0.390)     |
| Age difference parents        | 0.046 *<br>(0.086)    | 0.056 *<br>(0.080)    | 0.033 *<br>(0.064)     | -0.000<br>(0.988)       | -0.017<br>(0.541)     | -0.041<br>(0.301)     | 0.043<br>(0.164)      | 0.022<br>(0.292)      |
| Mother out of labor f. (d)    | -0.037<br>(0.767)     | -0.154<br>(0.274)     | -0.020<br>(0.802)      | 0.256<br>(0.358)        | -0.126<br>(0.419)     | 0.123<br>(0.526)      | 0.014<br>(0.916)      | -0.151<br>(0.548)     |
| Mother's education            | -0.859 ***<br>(0.000) | -0.291 **<br>(0.020)  | -0.561 ***<br>(0.000)  | -1.120 ***<br>(0.000)   | -0.658 ***<br>(0.000) | -0.891 ***<br>(0.000) | -0.660 ***<br>(0.000) | -0.926 ***<br>(0.000) |
| Father's education            | -0.989 ***<br>(0.000) | -0.387 *<br>(0.066)   | -0.747 ***<br>(0.000)  | -0.904 ***<br>(0.000)   | -0.657 ***<br>(0.000) | -1.029 ***<br>(0.000) | -1.002 ***<br>(0.000) | -0.680 ***<br>(0.000) |
| Highest parental educ.        | 3.890 ***<br>(0.000)  | 3.587 ***<br>(0.000)  | 2.886 ***<br>(0.000)   | 3.901 ***<br>(0.000)    | 3.840 ***<br>(0.000)  | 5.105 ***<br>(0.000)  | 5.818 ***<br>(0.000)  | 2.759 ***<br>(0.000)  |
| # of children in hh           | 0.063<br>(0.153)      | 0.097 *<br>(0.068)    | 0.004<br>(0.897)       | 0.066<br>(0.239)        | -0.008<br>(0.897)     | 0.302 ***<br>(0.000)  | 0.053<br>(0.317)      | 0.220 ***<br>(0.000)  |
| # of adults in hh             | 0.186 ***<br>(0.000)  | 0.060<br>(0.413)      | 0.022<br>(0.612)       | -0.120<br>(0.164)       | 0.026<br>(0.746)      | 0.109<br>(0.202)      | 0.103<br>(0.147)      | 0.014<br>(0.903)      |
| Financial situation           | -0.598 ***<br>(0.008) | -0.283<br>(0.390)     | -0.686 ***<br>(0.001)  | -0.115<br>(0.742)       | -0.233<br>(0.473)     | -0.025<br>(0.923)     | 0.945 ***<br>(0.001)  | -0.296<br>(0.219)     |
| Finance * highest educ.       | 0.166 *<br>(0.051)    | 0.045<br>(0.729)      | 0.207 ***<br>(0.004)   | -0.002<br>(0.990)       | -0.096<br>(0.398)     | -0.071<br>(0.517)     | -0.558 ***<br>(0.000) | 0.142<br>(0.148)      |
| N                             | 4639                  | 4078                  | 7955                   | 3148                    | 7605                  | 4374                  | 2784                  | 3751                  |

The table reports logit coefficients. p-value based on equation (3) in parenthesis. \*\*\*, \*\*, [\*] signify significance of the effects at the 1%, (5%), [10%] level, respectively, based on equation (4). (d) indicates that the variable is a dummy variable. For dummy variables the reported effect refers to a discrete change of the variable from 0 to 1.

Table B.3: Logit result for migrants' children

|                               | Austria               | Switzerland           | Germany             | Estonia              | France               | Croatia               | Luxemb.               | Latvia                |
|-------------------------------|-----------------------|-----------------------|---------------------|----------------------|----------------------|-----------------------|-----------------------|-----------------------|
| Intercept                     | -186.105<br>(0.532)   | -325.271 *<br>(0.077) | -193.005<br>(0.533) | 5.058<br>(0.959)     | 157.463<br>(0.679)   | 685.791 **<br>(0.026) | 145.636<br>(0.338)    | -96.115<br>(0.263)    |
| Birth year                    | 0.086<br>(0.569)      | 0.147<br>(0.111)      | 0.106<br>(0.507)    | -0.007<br>(0.886)    | -0.092<br>(0.634)    | -0.368 **<br>(0.020)  | -0.075<br>(0.325)     | 0.047<br>(0.276)      |
| Cohort 50s (d)                | 1.220<br>(0.735)      | 1.053<br>(0.629)      | -0.045<br>(0.988)   | -1.824<br>(0.148)    | 6.985<br>(0.149)     | -9.428 **<br>(0.012)  | -1.510<br>(0.538)     | -0.331<br>(0.749)     |
| Cohort 60s (d)                | 2.360<br>(0.297)      | 0.136<br>(0.913)      | -0.325<br>(0.865)   | -1.228<br>(0.103)    | 1.866<br>(0.453)     | -9.645 ***<br>(0.002) | -0.617<br>(0.615)     | -0.619<br>(0.377)     |
| Male (d)                      | -0.513<br>(0.631)     | -0.707<br>(0.351)     | -0.709<br>(0.527)   | 1.510 ***<br>(0.000) | -0.528<br>(0.757)    | 1.175<br>(0.254)      | -0.490<br>(0.443)     | 1.025 ***<br>(0.002)  |
| Mother's age at birth         | -0.051<br>(0.958)     | -1.171<br>(0.183)     | -2.371<br>(0.228)   | 0.160<br>(0.647)     | -1.622<br>(0.225)    | -0.225<br>(0.881)     | -2.494 ***<br>(0.001) | -0.138<br>(0.593)     |
| Mother's age at b., sq (/100) | 0.043<br>(0.974)      | 1.560<br>(0.321)      | 2.517<br>(0.391)    | -0.433<br>(0.479)    | 4.004<br>(0.111)     | -0.824<br>(0.735)     | 3.508 ***<br>(0.002)  | 0.074<br>(0.855)      |
| Father's age at birth         | -0.061<br>(0.944)     | 2.723 **<br>(0.029)   | 0.250<br>(0.810)    | -0.311<br>(0.260)    | 0.839<br>(0.670)     | 0.757<br>(0.923)      | 2.058 ***<br>(0.004)  | 0.014<br>(0.951)      |
| Father's age at b., sq (/100) | 0.372<br>(0.724)      | -4.382 **<br>(0.042)  | 0.404<br>(0.676)    | 0.531<br>(0.226)     | -2.602<br>(0.406)    | -0.210<br>(0.923)     | -2.711 ***<br>(0.004) | 0.087<br>(0.796)      |
| Age difference parents        | -0.259<br>(0.435)     | -0.421 *<br>(0.086)   | -0.426<br>(0.583)   | 0.030<br>(0.711)     | 0.230<br>(0.508)     | -1.039<br>(0.136)     | -0.303<br>(0.289)     | -0.101<br>(0.186)     |
| Mother out of labor f. (d)    | -1.863<br>(0.201)     | 2.765 ***<br>(0.000)  | -2.396<br>(0.100)   | -0.351<br>(0.704)    | -3.922 *<br>(0.074)  | 1.699<br>(0.165)      | 0.490<br>(0.490)      | 0.390<br>(0.632)      |
| Mother's education            | -2.227 *<br>(0.063)   | -1.452 ***<br>(0.004) | -0.286<br>(0.725)   | -0.676<br>(0.103)    | -2.133 *<br>(0.093)  | -3.326 ***<br>(0.003) | -1.214 *<br>(0.063)   | -1.147 ***<br>(0.002) |
| Father's education            | -4.255 **<br>(0.012)  | 526.049<br>(0.402)    | -0.016<br>(0.994)   | 0.455<br>(0.268)     | -2.881 **<br>(0.029) | 4.685<br>(0.256)      | -2.367 ***<br>(0.008) | -1.029 **<br>(0.012)  |
| Highest parental educ.        | 11.962 ***<br>(0.004) | -520.290<br>(0.407)   | 8.007<br>(0.121)    | 4.214 *<br>(0.060)   | 13.802 **<br>(0.015) | 11.953 **<br>(0.011)  | 8.238 ***<br>(0.002)  | 4.502 ***<br>(0.001)  |
| # of children in hh           | -0.001<br>(0.997)     | -0.252<br>(0.611)     | 0.149<br>(0.815)    | 0.518 **<br>(0.031)  | 1.044 **<br>(0.013)  | 0.375<br>(0.460)      | -0.322<br>(0.306)     | 0.103<br>(0.546)      |
| # of adults in hh             | -0.241<br>(0.557)     | 0.457<br>(0.400)      | -0.371<br>(0.607)   | -0.355<br>(0.245)    | -0.251<br>(0.736)    | 0.199<br>(0.732)      | 0.794 *<br>(0.056)    | -0.531<br>(0.234)     |
| Financial situation           | 1.451<br>(0.442)      | 0.897<br>(0.467)      | -2.234<br>(0.551)   | 0.538<br>(0.678)     | 1.586<br>(0.608)     | 4.416 *<br>(0.063)    | -1.529<br>(0.239)     | -0.283<br>(0.692)     |
| Finance * highest educ.       | -0.559<br>(0.469)     | -0.374<br>(0.433)     | 0.428<br>(0.744)    | -0.165<br>(0.744)    | -0.254<br>(0.832)    | -2.023 *<br>(0.065)   | -0.103<br>(0.853)     | -0.053<br>(0.854)     |
| N                             | 106                   | 317                   | 199                 | 357                  | 408                  | 235                   | 358                   | 500                   |

The table reports logit coefficients. p-value based on equation (3) in parenthesis. \*\*\*, \*\*, [\*] signify significance of the effects at the 1%, (5%), [10%] level, respectively, based on equation (4). (d) indicates that the variable is a dummy variable. For dummy variables the reported effect refers to a discrete change of the variable from 0 to 1.

**B.3 Logit results - marginal effects**

Table B.4: Logit results for natives' children (marginal effects)

|                               | Austria               | Switzerland           | Germany               | Estonia               | France                | Croatia               | Luxemb.               | Latvia                |
|-------------------------------|-----------------------|-----------------------|-----------------------|-----------------------|-----------------------|-----------------------|-----------------------|-----------------------|
| Birth year                    | 0.001<br>(0.294)      | -0.000<br>(0.817)     | 0.003 ***<br>(0.003)  | 0.007 ***<br>(0.000)  | 0.001<br>(0.291)      | -0.001<br>(0.190)     | -0.001<br>(0.548)     | 0.002 **<br>(0.040)   |
| Cohort 50s (d)                | 0.044<br>(0.107)      | 0.041<br>(0.147)      | 0.053 **<br>(0.037)   | 0.020<br>(0.579)      | 0.037 **<br>(0.040)   | -0.020<br>(0.284)     | 0.064<br>(0.155)      | -0.027<br>(0.301)     |
| Cohort 60s (d)                | 0.005<br>(0.760)      | 0.014<br>(0.390)      | 0.014<br>(0.335)      | -0.003<br>(0.898)     | 0.013<br>(0.166)      | -0.012<br>(0.311)     | 0.017<br>(0.506)      | -0.044 ***<br>(0.009) |
| Male (d)                      | -0.019 **<br>(0.010)  | -0.053 ***<br>(0.000) | -0.034 ***<br>(0.000) | 0.075 ***<br>(0.000)  | 0.014 ***<br>(0.001)  | 0.004<br>(0.471)      | -0.042 ***<br>(0.000) | 0.100 ***<br>(0.000)  |
| Mother's age at birth         | 0.002<br>(0.695)      | -0.004<br>(0.480)     | -0.008<br>(0.191)     | -0.005<br>(0.523)     | -0.004<br>(0.267)     | -0.013 **<br>(0.015)  | -0.016<br>(0.111)     | -0.004<br>(0.532)     |
| Mother's age at b., sq (/100) | -0.002<br>(0.838)     | 0.008<br>(0.412)      | 0.018 *<br>(0.076)    | 0.010<br>(0.423)      | 0.006<br>(0.359)      | 0.025 **<br>(0.010)   | 0.035 **<br>(0.047)   | 0.007<br>(0.534)      |
| Father's age at birth         | -0.008 *<br>(0.051)   | 0.003<br>(0.600)      | -0.006<br>(0.176)     | -0.019 ***<br>(0.001) | -0.001<br>(0.723)     | -0.001<br>(0.756)     | -0.015 *<br>(0.067)   | 0.004<br>(0.532)      |
| Father's age at b., sq (/100) | 0.010<br>(0.121)      | -0.006<br>(0.431)     | 0.003<br>(0.709)      | 0.026 ***<br>(0.003)  | 0.002<br>(0.685)      | 0.000<br>(0.993)      | 0.014<br>(0.229)      | -0.007<br>(0.391)     |
| Age difference parents        | 0.003 *<br>(0.087)    | 0.003 *<br>(0.080)    | 0.003 *<br>(0.063)    | -0.000<br>(0.989)     | -0.001<br>(0.542)     | -0.002<br>(0.301)     | 0.004<br>(0.162)      | 0.002<br>(0.293)      |
| Mother out of labor f. (d)    | -0.002<br>(0.770)     | -0.009<br>(0.274)     | -0.002<br>(0.804)     | 0.025<br>(0.351)      | -0.004<br>(0.421)     | 0.005<br>(0.525)      | 0.001<br>(0.927)      | -0.011<br>(0.569)     |
| Mother's education            | -0.055 ***<br>(0.000) | -0.016 **<br>(0.021)  | -0.054 ***<br>(0.000) | -0.102 ***<br>(0.000) | -0.022 ***<br>(0.000) | -0.036 ***<br>(0.000) | -0.061 ***<br>(0.000) | -0.077 ***<br>(0.000) |
| Father's education            | -0.063 ***<br>(0.000) | -0.022 *<br>(0.066)   | -0.071 ***<br>(0.000) | -0.082 ***<br>(0.000) | -0.022 ***<br>(0.000) | -0.042 ***<br>(0.000) | -0.092 ***<br>(0.000) | -0.057 ***<br>(0.000) |
| Highest parental educ.        | 0.249 ***<br>(0.000)  | 0.199 ***<br>(0.000)  | 0.276 ***<br>(0.000)  | 0.356 ***<br>(0.000)  | 0.126 ***<br>(0.000)  | 0.208 ***<br>(0.000)  | 0.534 ***<br>(0.000)  | 0.230 ***<br>(0.000)  |
| # of children in hh           | 0.004<br>(0.152)      | 0.005 *<br>(0.067)    | 0.000<br>(0.897)      | 0.006<br>(0.238)      | -0.000<br>(0.898)     | 0.012 ***<br>(0.000)  | 0.005<br>(0.316)      | 0.018 ***<br>(0.000)  |
| # of adults in hh             | 0.012 ***<br>(0.001)  | 0.003<br>(0.414)      | 0.002<br>(0.613)      | -0.011<br>(0.164)     | 0.001<br>(0.746)      | 0.004<br>(0.199)      | 0.009<br>(0.146)      | 0.001<br>(0.903)      |
| Financial situation           | -0.038 ***<br>(0.007) | -0.016<br>(0.391)     | -0.066 ***<br>(0.001) | -0.011<br>(0.741)     | 0.008<br>(0.473)      | -0.001<br>(0.924)     | 0.087 ***<br>(0.001)  | -0.025<br>(0.218)     |
| Finance * highest educ.       | 0.011 *<br>(0.050)    | 0.003<br>(0.728)      | 0.020 ***<br>(0.004)  | -0.000<br>(0.991)     | -0.003<br>(0.398)     | -0.003<br>(0.514)     | -0.051 ***<br>(0.000) | 0.012<br>(0.147)      |
| N                             | 4639                  | 4078                  | 7955                  | 3148                  | 7605                  | 4374                  | 2784                  | 3751                  |

The table reports average marginal effects. The constant term is not shown. p-value based on equation (3) in parenthesis. \*\*\*, (\*\*), [\*] signify significance of the effects at the 1%, (5%), [10%] level, respectively, based on equation (4). (d) indicates that the variable is a dummy variable. For dummy variables the reported effect refers to a discrete change of the variable from 0 to 1.

Table B.5: Logit results for migrants' children (marginal effects)

|                               | Austria               | Switzerland           | Germany             | Estonia              | France               | Croatia               | Luxemb.               | Latvia                |
|-------------------------------|-----------------------|-----------------------|---------------------|----------------------|----------------------|-----------------------|-----------------------|-----------------------|
| Intercept                     | -10.085<br>(0.539)    | -10.748 *<br>(0.079)  | -5.108<br>(0.535)   | 0.412<br>(0.962)     | 1.409<br>(0.677)     | 16.828 **<br>(0.019)  | 4.703<br>(0.339)      | -7.747<br>(0.262)     |
| Birth year                    | 0.005<br>(0.577)      | 0.005<br>(0.114)      | 0.003<br>(0.509)    | -0.001<br>(0.890)    | -0.001<br>(0.631)    | -0.009 **<br>(0.013)  | -0.002<br>(0.327)     | 0.004<br>(0.275)      |
| Cohort 50s (d)                | 0.088<br>(0.638)      | 0.064<br>(0.513)      | -0.000<br>(0.999)   | -0.129<br>(0.122)    | 0.067<br>(0.232)     | -0.140 ***<br>(0.002) | -0.021<br>(0.712)     | -0.020<br>(0.805)     |
| Cohort 60s (d)                | 0.152<br>(0.283)      | 0.006<br>(0.878)      | -0.004<br>(0.939)   | -0.104 *<br>(0.093)  | 0.017<br>(0.433)     | -0.155 ***<br>(0.000) | -0.017<br>(0.652)     | -0.044<br>(0.388)     |
| Male (d)                      | -0.026<br>(0.640)     | -0.022<br>(0.345)     | -0.018<br>(0.536)   | 0.128 ***<br>(0.000) | -0.004<br>(0.751)    | 0.027<br>(0.235)      | -0.016<br>(0.441)     | 0.080 ***<br>(0.001)  |
| Mother's age at birth         | -0.003<br>(0.958)     | -0.038<br>(0.188)     | -0.062<br>(0.217)   | 0.014<br>(0.646)     | -0.014<br>(0.215)    | -0.006<br>(0.875)     | -0.081 ***<br>(0.000) | -0.011<br>(0.591)     |
| Mother's age at b., sq (/100) | 0.002<br>(0.977)      | 0.051<br>(0.328)      | 0.065<br>(0.387)    | -0.037<br>(0.477)    | 0.035<br>(0.101)     | -0.020<br>(0.742)     | 0.113 ***<br>(0.001)  | 0.006<br>(0.853)      |
| Father's age at birth         | -0.003<br>(0.950)     | 0.090 **<br>(0.030)   | 0.007<br>(0.806)    | -0.027<br>(0.258)    | 0.008<br>(0.661)     | 0.019<br>(0.609)      | 0.067 ***<br>(0.002)  | 0.001<br>(0.947)      |
| Father's age at b., sq (/100) | 0.020<br>(0.730)      | -0.144 **<br>(0.043)  | 0.011<br>(0.683)    | 0.046<br>(0.224)     | -0.023<br>(0.404)    | -0.006<br>(0.918)     | -0.088 ***<br>(0.002) | 0.007<br>(0.802)      |
| Age difference parents        | -0.014<br>(0.425)     | -0.014 *<br>(0.089)   | -0.011<br>(0.582)   | 0.003<br>(0.712)     | 0.002<br>(0.511)     | -0.026<br>(0.161)     | -0.010<br>(0.291)     | -0.008<br>(0.182)     |
| Mother out of labor f. (d)    | -0.088<br>(0.165)     | 0.107 ***<br>(0.000)  | -0.052 *<br>(0.065) | -0.022<br>(0.764)    | -0.027 **<br>(0.029) | 0.042<br>(0.162)      | 0.016<br>(0.492)      | 0.042<br>(0.554)      |
| Mother's education            | -0.121 **<br>(0.048)  | -0.048 ***<br>(0.003) | -0.007<br>(0.732)   | -0.059<br>(0.101)    | -0.018 *<br>(0.069)  | -0.082 ***<br>(0.002) | -0.039 *<br>(0.059)   | -0.093 ***<br>(0.001) |
| Father's education            | -0.232 ***<br>(0.004) | 17.657<br>(0.424)     | -0.000<br>(0.998)   | 0.039<br>(0.269)     | -0.025 **<br>(0.017) | 0.114<br>(0.251)      | -0.076 ***<br>(0.004) | -0.083 **<br>(0.010)  |
| Highest parental educ.        | 0.653 ***<br>(0.001)  | -17.467<br>(0.428)    | 0.209<br>(0.112)    | 0.365 *<br>(0.057)   | 0.120 **<br>(0.011)  | 0.295 ***<br>(0.008)  | 0.266 ***<br>(0.001)  | 0.363 ***<br>(0.000)  |
| # of children in hh           | -0.000<br>(0.991)     | -0.008<br>(0.616)     | 0.004<br>(0.807)    | 0.045 **<br>(0.028)  | 0.009 ***<br>(0.004) | 0.009<br>(0.459)      | -0.010<br>(0.307)     | 0.008<br>(0.546)      |
| # of adults in hh             | -0.013<br>(0.556)     | 0.015<br>(0.407)      | -0.010<br>(0.610)   | -0.031<br>(0.242)    | -0.002<br>(0.746)    | 0.005<br>(0.742)      | 0.026 *<br>(0.054)    | -0.043<br>(0.231)     |
| Financial situation           | 0.080<br>(0.444)      | 0.030<br>(0.465)      | -0.059<br>(0.557)   | 0.046<br>(0.681)     | 0.014<br>(0.609)     | 0.108 *<br>(0.055)    | -0.049<br>(0.236)     | -0.023<br>(0.691)     |
| Finance * highest educ.       | -0.031<br>(0.472)     | -0.012<br>(0.430)     | 0.012<br>(0.745)    | -0.014<br>(0.745)    | -0.002<br>(0.823)    | -0.050 *<br>(0.058)   | -0.003<br>(0.851)     | -0.004<br>(0.858)     |
| N                             | 106                   | 317                   | 199                 | 357                  | 408                  | 235                   | 358                   | 500                   |

The table reports average marginal effects. The constant term is not shown. p-value based on equation (3) in parenthesis. \*\*\*, (\*\*), [\*] signify significance of the effects at the 1%, (5%), [10%] level, respectively, based on equation (4). (d) indicates that the variable is a dummy variable. For dummy variables the reported effect refers to a discrete change of the variable from 0 to 1.

## B.4 Gelman statistics

Table B.6: Gelman statistics

|                               | Austria | Switzerland | Germany | Estonia | France | Croatia | Luxemb. | Latvia |
|-------------------------------|---------|-------------|---------|---------|--------|---------|---------|--------|
| Natives' children             |         |             |         |         |        |         |         |        |
| Intercept                     | 1.00    | 1.00        | 1.00    | 1.00    | 1.00   | 1.00    | 1.00    | 1.00   |
| Birth year                    | 1.00    | 1.00        | 1.00    | 1.00    | 1.00   | 1.00    | 1.00    | 1.00   |
| Cohort 50s (d)                | 1.00    | 1.00        | 1.00    | 1.00    | 1.00   | 1.00    | 1.00    | 1.00   |
| Cohort 60s (d)                | 1.00    | 1.00        | 1.00    | 1.00    | 1.00   | 1.00    | 1.00    | 1.00   |
| Male (d)                      | 1.00    | 1.00        | 1.00    | 1.00    | 1.00   | 1.00    | 1.00    | 1.00   |
| Mother's age at birth         | 1.00    | 1.00        | 1.00    | 1.00    | 1.00   | 1.00    | 1.00    | 1.00   |
| Mother's age at b., sq (/100) | 1.00    | 1.00        | 1.00    | 1.00    | 1.00   | 1.00    | 1.00    | 1.00   |
| Father's age at birth         | 1.00    | 1.00        | 1.00    | 1.00    | 1.00   | 1.00    | 1.00    | 1.00   |
| Father's age at b., sq (/100) | 1.00    | 1.00        | 1.00    | 1.00    | 1.00   | 1.00    | 1.00    | 1.00   |
| Age difference parents        | 1.00    | 1.00        | 1.00    | 1.00    | 1.00   | 1.00    | 1.00    | 1.00   |
| Mother out of labor f. (d)    | 1.00    | 1.00        | 1.00    | 1.00    | 1.00   | 1.00    | 1.00    | 1.00   |
| Mother's education            | 1.00    | 1.00        | 1.00    | 1.00    | 1.00   | 1.00    | 1.00    | 1.00   |
| Father's education            | 1.00    | 1.00        | 1.00    | 1.00    | 1.00   | 1.00    | 1.00    | 1.00   |
| Highest parental educ.        | 1.00    | 1.00        | 1.00    | 1.00    | 1.00   | 1.00    | 1.00    | 1.00   |
| # of children in hh           | 1.00    | 1.00        | 1.00    | 1.00    | 1.00   | 1.00    | 1.00    | 1.00   |
| # of adults in hh             | 1.00    | 1.00        | 1.00    | 1.00    | 1.00   | 1.00    | 1.00    | 1.00   |
| Financial situation           | 1.00    | 1.00        | 1.00    | 1.00    | 1.00   | 1.00    | 1.00    | 1.00   |
| Finance * highest educ.       | 1.00    | 1.00        | 1.00    | 1.00    | 1.00   | 1.00    | 1.00    | 1.00   |
| Migrants' children            |         |             |         |         |        |         |         |        |
| Intercept                     | 1.01    | 1.01        | 1.02    | 1.00    | 1.01   | 1.06    | 1.00    | 1.00   |
| Birth year                    | 1.01    | 1.01        | 1.02    | 1.00    | 1.01   | 1.06    | 1.00    | 1.00   |
| Cohort 50s (d)                | 1.00    | 1.00        | 1.02    | 1.00    | 1.02   | 1.05    | 1.00    | 1.00   |
| Cohort 60s (d)                | 1.00    | 1.00        | 1.01    | 1.00    | 1.01   | 1.05    | 1.00    | 1.00   |
| Male (d)                      | 1.00    | 1.00        | 1.00    | 1.00    | 1.01   | 1.00    | 1.00    | 1.00   |
| Mother's age at birth         | 1.00    | 1.00        | 1.01    | 1.00    | 1.01   | 1.01    | 1.00    | 1.00   |
| Mother's age at b., sq (/100) | 1.00    | 1.00        | 1.01    | 1.00    | 1.02   | 1.01    | 1.00    | 1.00   |
| Father's age at birth         | 1.00    | 1.01        | 1.00    | 1.00    | 1.03   | 1.00    | 1.00    | 1.00   |
| Father's age at b., sq (/100) | 1.00    | 1.01        | 1.00    | 1.00    | 1.03   | 1.00    | 1.00    | 1.00   |
| Age difference parents        | 1.00    | 1.00        | 1.01    | 1.00    | 1.01   | 1.00    | 1.00    | 1.00   |
| Mother out of labor f. (d)    | 1.00    | 1.00        | 1.01    | 1.00    | 1.01   | 1.00    | 1.00    | 1.00   |
| Mother's education            | 1.00    | 1.00        | 1.00    | 1.00    | 1.00   | 1.01    | 1.00    | 1.00   |
| Father's education            | 1.00    | 2.78        | 1.00    | 1.00    | 1.01   | 1.00    | 1.00    | 1.00   |
| Highest parental educ.        | 1.00    | 2.78        | 1.01    | 1.00    | 1.07   | 1.02    | 1.00    | 1.00   |
| # of children in hh           | 1.00    | 1.00        | 1.00    | 1.00    | 1.02   | 1.00    | 1.00    | 1.00   |
| # of adults in hh             | 1.00    | 1.00        | 1.00    | 1.00    | 1.01   | 1.00    | 1.00    | 1.00   |
| Financial situation           | 1.00    | 1.00        | 1.00    | 1.00    | 1.03   | 1.02    | 1.01    | 1.00   |
| Finance * highest educ.       | 1.00    | 1.00        | 1.00    | 1.00    | 1.02   | 1.02    | 1.00    | 1.00   |

## C Upward mobility conditional on parental education

### C.1 Descriptive statistics

Table C.1: Descriptive statistics of all variables for the sample used for upward mobility

|                            | BE                        | CH    | CZ    | EE    | FR    | HR    | LU    | LV    |
|----------------------------|---------------------------|-------|-------|-------|-------|-------|-------|-------|
|                            | <i>Natives' children</i>  |       |       |       |       |       |       |       |
| Birth year                 | 1964                      | 1961  | 1965  | 1961  | 1965  | 1963  | 1963  | 1962  |
| Cohort 50s (d)             | 0.38                      | 0.48  | 0.38  | 0.50  | 0.33  | 0.44  | 0.43  | 0.45  |
| Cohort 60s (d)             | 0.35                      | 0.36  | 0.27  | 0.36  | 0.34  | 0.36  | 0.35  | 0.35  |
| Male (d)                   | 0.49                      | 0.43  | 0.43  | 0.49  | 0.45  | 0.49  | 0.48  | 0.46  |
| Father's age at birth      | 30.76                     | 34.14 | 28.31 | 32.86 | 29.81 | 30.27 | 31.63 | 31.58 |
| Mother's age at birth      | 28.16                     | 29.77 | 25.08 | 29.35 | 26.97 | 26.86 | 27.94 | 28.94 |
| Age difference parents     | 3.32                      | 5.07  | 3.69  | 5.20  | 3.67  | 4.24  | 4.50  | 4.33  |
| Mother out of labor f. (d) | 0.60                      | 0.51  | 0.10  | 0.15  | 0.46  | 0.69  | 0.62  | 0.11  |
| # of adults in hh          | 2.49                      | 2.94  | 2.21  | 2.37  | 2.48  | 2.75  | 2.73  | 2.23  |
| # of children in hh        | 2.67                      | 2.91  | 2.33  | 2.50  | 1.67  | 2.36  | 2.57  | 2.61  |
| Financial situation        | 4.16                      | 3.81  | 3.87  | 3.78  | 3.80  | 3.25  | 3.91  | 3.87  |
|                            | <i>Migrants' children</i> |       |       |       |       |       |       |       |
| Birth year                 | 1969                      | 1971  | 1961  | 1961  | 1969  | 1967  | 1972  | 1961  |
| Cohort 50s (d)             | 0.28                      | 0.13  | 0.57  | 0.46  | 0.20  | 0.25  | 0.08  | 0.45  |
| Cohort 60s (d)             | 0.24                      | 0.27  | 0.31  | 0.38  | 0.30  | 0.37  | 0.28  | 0.42  |
| Male (d)                   | 0.51                      | 0.46  | 0.36  | 0.49  | 0.52  | 0.48  | 0.55  | 0.51  |
| Father's age at birth      | 32.45                     | 31.41 | 28.90 | 31.11 | 32.49 | 31.15 | 30.49 | 31.24 |
| Mother's age at birth      | 27.65                     | 27.60 | 26.27 | 29.32 | 27.73 | 28.20 | 27.17 | 29.87 |
| Age difference parents     | 5.31                      | 4.61  | 3.81  | 3.95  | 5.18  | 3.95  | 4.31  | 3.19  |
| Mother out of labor f. (d) | 0.72                      | 0.32  | 0.15  | 0.08  | 0.57  | 0.82  | 0.49  | 0.06  |
| # of adults in hh          | 2.58                      | 2.54  | 2.31  | 2.43  | 2.92  | 3.10  | 2.43  | 2.19  |
| # of children in hh        | 3.19                      | 1.93  | 3.14  | 2.05  | 2.11  | 2.63  | 2.53  | 2.71  |
| Financial situation        | 3.69                      | 4.15  | 3.72  | 3.96  | 3.72  | 3.07  | 4.08  | 3.73  |

Age difference refers to the absolute age difference between the parents. Mother out of labor force is an indicator whether the respondents' mother was in or out of the labor force when the respondent was 14. # of persons in the household refers to the number of adults and children, respectively, in the household in which the respondents lived when they were 14 years old. Financial situation refers to the financial situation of the household in which the respondents lived when they were 14 years old. A detailed definition of variables can be found in the variable table A.3.

### C.2 Logit coefficients

Table C.2: Logit result for natives' children

|                               | Belgium               | Switzerland          | Czech Rep.            | Estonia               | France                  | Croatia              | Luxemb.              | Latvia                |
|-------------------------------|-----------------------|----------------------|-----------------------|-----------------------|-------------------------|----------------------|----------------------|-----------------------|
| Intercept                     | -27.328<br>(0.444)    | 13.563<br>(0.859)    | -56.200<br>(0.154)    | 31.165<br>(0.610)     | -112.603 ***<br>(0.000) | 1.308<br>(0.964)     | -69.261 *<br>(0.084) | 113.857 **<br>(0.016) |
| Birth year                    | 0.013<br>(0.469)      | -0.006<br>(0.885)    | 0.031<br>(0.125)      | -0.015<br>(0.633)     | 0.057 ***<br>(0.000)    | -0.002<br>(0.901)    | 0.033 *<br>(0.099)   | -0.059 **<br>(0.014)  |
| Cohort 50s (d)                | -0.816 **<br>(0.039)  | -0.711<br>(0.408)    | -0.240<br>(0.595)     | 0.650<br>(0.349)      | 0.140<br>(0.585)        | -0.383<br>(0.251)    | 0.149<br>(0.743)     | 0.263<br>(0.608)      |
| Cohort 60s (d)                | -0.241<br>(0.346)     | -0.148<br>(0.804)    | 0.231<br>(0.432)      | 1.429 ***<br>(0.002)  | 0.219<br>(0.189)        | 0.063<br>(0.770)     | -0.056<br>(0.847)    | 1.016 ***<br>(0.002)  |
| Gender (d)                    | -0.056<br>(0.608)     | 1.031 ***<br>(0.000) | 0.831 ***<br>(0.000)  | -0.782 ***<br>(0.000) | 0.288 ***<br>(0.000)    | 0.777 ***<br>(0.000) | 0.594 ***<br>(0.000) | -0.846 ***<br>(0.000) |
| Mother's age at birth         | 0.016<br>(0.855)      | -0.235<br>(0.220)    | -0.025<br>(0.813)     | -0.013<br>(0.925)     | 0.092<br>(0.109)        | -0.008<br>(0.911)    | 0.110<br>(0.294)     | 0.149<br>(0.137)      |
| Mother's age at b., sq (/100) | -0.027<br>(0.838)     | 0.385<br>(0.196)     | -0.021<br>(0.911)     | -0.034<br>(0.880)     | -0.192 **<br>(0.049)    | -0.037<br>(0.754)    | -0.113<br>(0.519)    | -0.177<br>(0.264)     |
| Father's age at birth         | 0.145 *<br>(0.054)    | 0.202<br>(0.140)     | -0.040<br>(0.646)     | -0.020<br>(0.842)     | 0.014<br>(0.761)        | 0.140 **<br>(0.012)  | 0.053<br>(0.500)     | 0.040<br>(0.597)      |
| Father's age at b., sq (/100) | -0.193 *<br>(0.079)   | -0.268<br>(0.150)    | 0.138<br>(0.312)      | 0.083<br>(0.558)      | 0.016<br>(0.816)        | -0.143 *<br>(0.075)  | -0.081<br>(0.479)    | -0.100<br>(0.350)     |
| Age difference parents        | -0.032<br>(0.167)     | -0.009<br>(0.867)    | -0.031<br>(0.309)     | -0.053 *<br>(0.092)   | -0.029 *<br>(0.054)     | -0.051 **<br>(0.017) | -0.010<br>(0.767)    | 0.019<br>(0.476)      |
| Mother out of labor f. (d)    | -0.345 ***<br>(0.005) | -0.106<br>(0.637)    | -0.582 ***<br>(0.000) | 0.456<br>(0.156)      | -0.076<br>(0.291)       | 0.222 **<br>(0.024)  | 0.059<br>(0.663)     | 0.130<br>(0.596)      |
| # of children in hh           | -0.063 **<br>(0.045)  | -0.151 **<br>(0.028) | -0.316 ***<br>(0.000) | -0.060<br>(0.335)     | -0.127 ***<br>(0.000)   | -0.087 **<br>(0.016) | -0.010<br>(0.801)    | -0.152 ***<br>(0.002) |
| # of adults in hh             | -0.044<br>(0.363)     | -0.131 *<br>(0.068)  | -0.148 *<br>(0.074)   | -0.368 ***<br>(0.001) | -0.146 ***<br>(0.000)   | 0.020<br>(0.608)     | -0.032<br>(0.549)    | -0.161<br>(0.125)     |
| Financial situation           | 0.215 ***<br>(0.000)  | -0.013<br>(0.894)    | 0.073<br>(0.190)      | 0.210 *<br>(0.050)    | 0.140 ***<br>(0.000)    | 0.219 ***<br>(0.000) | 0.191 ***<br>(0.002) | 0.135 *<br>(0.078)    |
| N                             | 1781                  | 630                  | 3428                  | 836                   | 5493                    | 2309                 | 1088                 | 1316                  |

The table reports logit coefficients. p-value based on equation (3) in parenthesis. \*\*\*, (\*\*), [\*] signify significance of the effects at the 1%, (5%), [10%] level, respectively, based on equation (4). (d) indicates that the variable is a dummy variable. For dummy variables the reported effect refers to a discrete change of the variable from 0 to 1.

Table C.3: Logit result for migrants' children

|                               | Belgium               | Switzerland          | Czech Rep.            | Estonia               | France               | Croatia            | Luxemb.              | Latvia                |
|-------------------------------|-----------------------|----------------------|-----------------------|-----------------------|----------------------|--------------------|----------------------|-----------------------|
| Intercept                     | -286.379<br>(0.130)   | -364.882<br>(0.182)  | 516.266 **<br>(0.029) | -66.702<br>(0.876)    | 48.013<br>(0.574)    | -45.892<br>(0.711) | 14.502<br>(0.867)    | 365.495 **<br>(0.031) |
| Birth year                    | 0.148<br>(0.122)      | 0.195<br>(0.160)     | -0.263 **<br>(0.027)  | 0.031<br>(0.888)      | -0.025<br>(0.565)    | 0.020<br>(0.750)   | -0.007<br>(0.866)    | -0.183 **<br>(0.033)  |
| Cohort 50s (d)                | 2.370<br>(0.280)      | 2.938<br>(0.342)     | -5.116 *<br>(0.057)   | -0.546<br>(0.911)     | -0.251<br>(0.806)    | 0.396<br>(0.790)   | -1.144<br>(0.294)    | -2.652<br>(0.178)     |
| Cohort 60s (d)                | 1.444<br>(0.308)      | 2.180<br>(0.255)     | -1.820<br>(0.318)     | -1.062<br>(0.745)     | -0.411<br>(0.505)    | 0.757<br>(0.417)   | -0.049<br>(0.938)    | -0.770<br>(0.564)     |
| Gender (d)                    | -1.188 *<br>(0.056)   | 0.948<br>(0.348)     | -0.398<br>(0.588)     | -4.808 ***<br>(0.005) | 0.411<br>(0.178)     | 0.522<br>(0.279)   | 0.662 **<br>(0.038)  | -0.746<br>(0.136)     |
| Mother's age at birth         | 0.731<br>(0.162)      | -2.178<br>(0.205)    | 0.294<br>(0.668)      | 0.475<br>(0.667)      | -0.047<br>(0.851)    | -0.215<br>(0.640)  | 0.460 *<br>(0.092)   | 0.652<br>(0.215)      |
| Mother's age at b., sq (/100) | -0.601<br>(0.369)     | 5.117<br>(0.136)     | -0.106<br>(0.927)     | -0.343<br>(0.851)     | -0.175<br>(0.643)    | 0.233<br>(0.758)   | -1.016 **<br>(0.029) | -1.089<br>(0.210)     |
| Father's age at birth         | -0.708<br>(0.170)     | 0.477<br>(0.597)     | 0.202<br>(0.632)      | 0.421<br>(0.551)      | 0.190<br>(0.421)     | 0.546<br>(0.273)   | -0.286<br>(0.189)    | -1.056 *<br>(0.099)   |
| Father's age at b., sq (/100) | 0.428<br>(0.413)      | -1.158<br>(0.465)    | -0.607<br>(0.284)     | -1.082<br>(0.325)     | 0.009<br>(0.976)     | -0.528<br>(0.467)  | 0.728 **<br>(0.043)  | 1.840 *<br>(0.075)    |
| Age difference parents        | 0.306<br>(0.335)      | 0.220<br>(0.527)     | 0.286<br>(0.223)      | 0.465<br>(0.105)      | -0.178 *<br>(0.090)  | 0.034<br>(0.799)   | -0.092<br>(0.205)    | 0.240 *<br>(0.057)    |
| Mother out of labor f. (d)    | -0.209<br>(0.801)     | -1.279<br>(0.198)    | -0.536<br>(0.575)     | -3.068<br>(0.164)     | -0.709 **<br>(0.044) | -0.185<br>(0.799)  | 0.100<br>(0.774)     | -0.490<br>(0.676)     |
| # of children in hh           | -0.501 ***<br>(0.004) | 1.070 *<br>(0.093)   | -0.134<br>(0.423)     | -1.888 ***<br>(0.005) | 0.047<br>(0.574)     | -0.024<br>(0.875)  | -0.317 **<br>(0.016) | 0.003<br>(0.988)      |
| # of adults in hh             | -0.305<br>(0.260)     | -1.081 **<br>(0.044) | -0.991 **<br>(0.023)  | -1.418<br>(0.112)     | -0.157 *<br>(0.065)  | -0.247<br>(0.121)  | -0.044<br>(0.832)    | -0.285<br>(0.535)     |
| Financial situation           | 0.181<br>(0.435)      | 0.159<br>(0.655)     | -0.192<br>(0.511)     | 1.689 **<br>(0.046)   | 0.176<br>(0.245)     | 0.286 *<br>(0.078) | -0.209<br>(0.288)    | 0.448<br>(0.109)      |
| N                             | 101                   | 127                  | 81                    | 79                    | 340                  | 137                | 240                  | 170                   |

The table reports logit coefficients. p-value based on equation (3) in parenthesis. \*\*\*, (\*\*), [\*] signify significance of the effects at the 1%, (5%), [10%] level, respectively, based on equation (4). (d) indicates that the variable is a dummy variable. For dummy variables the reported effect refers to a discrete change of the variable from 0 to 1.

### C.3 Logit results - marginal effects

Table C.4: Logit result for natives' children (marginal effects)

|                               | Belgium               | Switzerland          | Czech Rep.            | Estonia               | France                 | Croatia              | Luxemb.              | Latvia                |
|-------------------------------|-----------------------|----------------------|-----------------------|-----------------------|------------------------|----------------------|----------------------|-----------------------|
| Intercept                     | -5.149<br>(0.444)     | 1.687<br>(0.859)     | -4.715<br>(0.156)     | 3.802<br>(0.612)      | -16.562 ***<br>(0.000) | 0.260<br>(0.964)     | -15.671 *<br>(0.083) | 15.384 **<br>(0.015)  |
| Birth year                    | 0.002<br>(0.469)      | -0.001<br>(0.885)    | 0.003<br>(0.127)      | -0.002<br>(0.635)     | 0.008 ***<br>(0.000)   | -0.000<br>(0.902)    | 0.008 *<br>(0.098)   | -0.008 **<br>(0.013)  |
| Cohort 50s (d)                | -0.163 **<br>(0.040)  | -0.089<br>(0.409)    | -0.021<br>(0.594)     | 0.084<br>(0.346)      | 0.019<br>(0.597)       | -0.078<br>(0.248)    | 0.031<br>(0.752)     | 0.037<br>(0.602)      |
| Cohort 60s (d)                | -0.045<br>(0.344)     | -0.022<br>(0.773)    | 0.017<br>(0.452)      | 0.156 ***<br>(0.001)  | 0.031<br>(0.186)       | 0.012<br>(0.773)     | -0.013<br>(0.841)    | 0.130 ***<br>(0.001)  |
| Gender (d)                    | -0.011<br>(0.609)     | 0.119 ***<br>(0.000) | 0.065 ***<br>(0.000)  | -0.095 ***<br>(0.000) | 0.042 ***<br>(0.000)   | 0.157 ***<br>(0.000) | 0.136 ***<br>(0.000) | -0.117 ***<br>(0.000) |
| Mother's age at birth         | 0.003<br>(0.854)      | -0.029<br>(0.218)    | -0.002<br>(0.812)     | -0.002<br>(0.926)     | 0.013<br>(0.109)       | -0.002<br>(0.911)    | 0.025<br>(0.292)     | 0.020<br>(0.136)      |
| Mother's age at b., sq (/100) | -0.005<br>(0.838)     | 0.047<br>(0.193)     | -0.002<br>(0.912)     | -0.004<br>(0.879)     | -0.028 **<br>(0.048)   | -0.007<br>(0.753)    | -0.026<br>(0.519)    | -0.024<br>(0.264)     |
| Father's age at birth         | 0.027 *<br>(0.054)    | 0.025<br>(0.141)     | -0.003<br>(0.647)     | -0.002<br>(0.842)     | 0.002<br>(0.761)       | 0.028 **<br>(0.011)  | 0.012<br>(0.500)     | 0.005<br>(0.597)      |
| Father's age at b., sq (/100) | -0.036 *<br>(0.079)   | -0.033<br>(0.151)    | 0.012<br>(0.313)      | 0.010<br>(0.557)      | 0.002<br>(0.816)       | -0.029 *<br>(0.073)  | -0.018<br>(0.479)    | -0.014<br>(0.352)     |
| Age difference parents        | -0.006<br>(0.166)     | -0.001<br>(0.866)    | -0.003<br>(0.310)     | -0.006 *<br>(0.092)   | -0.004 *<br>(0.054)    | -0.010 **<br>(0.017) | -0.002<br>(0.766)    | 0.003<br>(0.474)      |
| Mother out of labor f. (d)    | -0.064 ***<br>(0.004) | -0.013<br>(0.638)    | -0.058 ***<br>(0.002) | 0.049<br>(0.134)      | -0.011<br>(0.291)      | 0.045 **<br>(0.024)  | 0.013<br>(0.662)     | 0.016<br>(0.620)      |
| # of children in hh           | -0.012 **<br>(0.044)  | -0.019 **<br>(0.028) | -0.026 ***<br>(0.000) | -0.007<br>(0.334)     | -0.019 ***<br>(0.000)  | -0.017 **<br>(0.016) | -0.002<br>(0.801)    | -0.021 ***<br>(0.002) |
| # of adults in hh             | -0.008<br>(0.363)     | -0.016 *<br>(0.065)  | -0.012 *<br>(0.075)   | -0.045 ***<br>(0.001) | -0.022 ***<br>(0.000)  | 0.004<br>(0.609)     | -0.007<br>(0.549)    | -0.022<br>(0.124)     |
| Financial situation           | 0.040 ***<br>(0.000)  | -0.002<br>(0.896)    | 0.006<br>(0.193)      | 0.026 *<br>(0.051)    | 0.021 ***<br>(0.000)   | 0.044 ***<br>(0.000) | 0.043 ***<br>(0.002) | 0.018 *<br>(0.078)    |
| N                             | 1781                  | 630                  | 3428                  | 836                   | 5493                   | 2309                 | 1088                 | 1316                  |

The table reports average marginal effects. The constant term is not shown. p-value based on equation (3) in parenthesis. \*\*\*, (\*\*), [\*] signify significance of the effects at the 1%, (5%), [10%] level, respectively, based on equation (4). (d) indicates that the variable is a dummy variable. For dummy variables the reported effect refers to a discrete change of the variable from 0 to 1.

Table C.5: Logit results for migrants' children (marginal effects)

|                               | Belgium               | Switzerland         | Czech Rep.            | Estonia               | France               | Croatia            | Luxemb.              | Latvia               |
|-------------------------------|-----------------------|---------------------|-----------------------|-----------------------|----------------------|--------------------|----------------------|----------------------|
| Birth year                    | 0.018<br>(0.114)      | 0.008<br>(0.166)    | -0.031 **<br>(0.018)  | 0.002<br>(0.889)      | -0.003<br>(0.569)    | 0.003<br>(0.751)   | -0.001<br>(0.863)    | -0.020 **<br>(0.034) |
| Cohort 50s (d)                | 0.185<br>(0.275)      | 0.055<br>(0.573)    | -0.386 ***<br>(0.004) | -0.046<br>(0.847)     | -0.052<br>(0.721)    | 0.029<br>(0.881)   | -0.221<br>(0.259)    | -0.263<br>(0.143)    |
| Cohort 60s (d)                | 0.136<br>(0.309)      | 0.066<br>(0.286)    | -0.211<br>(0.265)     | -0.060<br>(0.731)     | -0.060<br>(0.490)    | 0.112<br>(0.410)   | -0.012<br>(0.907)    | -0.083<br>(0.556)    |
| Gender (d)                    | -0.145 **<br>(0.045)  | 0.038<br>(0.352)    | -0.050<br>(0.578)     | -0.233 ***<br>(0.000) | 0.053<br>(0.179)     | 0.081<br>(0.270)   | 0.114 **<br>(0.038)  | -0.079<br>(0.134)    |
| Mother's age at birth         | 0.090<br>(0.163)      | -0.092<br>(0.215)   | 0.034<br>(0.669)      | 0.028<br>(0.674)      | -0.006<br>(0.847)    | -0.034<br>(0.638)  | 0.077 *<br>(0.087)   | 0.070<br>(0.223)     |
| Mother's age at b., sq (/100) | -0.073<br>(0.374)     | 0.218<br>(0.143)    | -0.012<br>(0.931)     | -0.020<br>(0.855)     | -0.022<br>(0.649)    | 0.037<br>(0.755)   | -0.170 **<br>(0.024) | -0.116<br>(0.218)    |
| Father's age at birth         | -0.087<br>(0.171)     | 0.019<br>(0.625)    | 0.023<br>(0.636)      | 0.026<br>(0.549)      | 0.024<br>(0.419)     | 0.085<br>(0.266)   | -0.048<br>(0.183)    | -0.113<br>(0.104)    |
| Father's age at b., sq (/100) | 0.053<br>(0.416)      | -0.048<br>(0.488)   | -0.070<br>(0.269)     | -0.065<br>(0.324)     | 0.001<br>(0.979)     | -0.082<br>(0.467)  | 0.122 **<br>(0.037)  | 0.197 *<br>(0.079)   |
| Age difference parents        | 0.038<br>(0.339)      | 0.010<br>(0.538)    | 0.034<br>(0.230)      | 0.028 *<br>(0.094)    | -0.023 *<br>(0.091)  | 0.005<br>(0.794)   | -0.015<br>(0.202)    | 0.026 *<br>(0.057)   |
| Mother out of labor f. (d)    | -0.020<br>(0.836)     | -0.062<br>(0.199)   | -0.078<br>(0.530)     | -0.244<br>(0.161)     | -0.088 **<br>(0.037) | -0.022<br>(0.836)  | 0.016<br>(0.780)     | -0.082<br>(0.553)    |
| # of children in hh           | -0.061 ***<br>(0.001) | 0.046 *<br>(0.098)  | -0.015<br>(0.424)     | -0.112 ***<br>(0.001) | 0.006<br>(0.576)     | -0.004<br>(0.872)  | -0.053 **<br>(0.013) | 0.000<br>(0.981)     |
| # of adults in hh             | -0.037<br>(0.258)     | -0.046 *<br>(0.054) | -0.114 **<br>(0.011)  | -0.085 *<br>(0.098)   | -0.020 *<br>(0.061)  | -0.038<br>(0.111)  | -0.007<br>(0.832)    | -0.030<br>(0.544)    |
| Financial situation           | 0.022<br>(0.436)      | 0.007<br>(0.665)    | -0.022<br>(0.510)     | 0.100 **<br>(0.030)   | 0.023<br>(0.244)     | 0.045 *<br>(0.068) | -0.035<br>(0.289)    | 0.048<br>(0.109)     |
| N                             | 101                   | 127                 | 81                    | 79                    | 340                  | 137                | 240                  | 170                  |

The table reports average marginal effects. The constant term is not shown. p-value based on equation (3) in parenthesis. \*\*\*, (\*\*), [\*] signify significance of the effects at the 1%, (5%), [10%] level, respectively, based on equation (4). (d) indicates that the variable is a dummy variable. For dummy variables the reported effect refers to a discrete change of the variable from 0 to 1.

## C.4 Gelman statistics

Table C.6: Gelman statistics

|                               | Belgium | Switzerland | Czech Rep. | Estonia | France | Croatia | Luxemb. | Latvia |
|-------------------------------|---------|-------------|------------|---------|--------|---------|---------|--------|
| Natives' children             |         |             |            |         |        |         |         |        |
| Intercept                     | 1.00    | 1.00        | 1.00       | 1.00    | 1.00   | 1.00    | 1.00    | 1.00   |
| Birth year                    | 1.00    | 1.00        | 1.00       | 1.00    | 1.00   | 1.00    | 1.00    | 1.00   |
| Cohort 50s (d)                | 1.00    | 1.00        | 1.00       | 1.00    | 1.00   | 1.00    | 1.00    | 1.00   |
| Cohort 60s (d)                | 1.00    | 1.00        | 1.00       | 1.00    | 1.00   | 1.00    | 1.00    | 1.00   |
| Male (d)                      | 1.00    | 1.00        | 1.00       | 1.00    | 1.00   | 1.00    | 1.00    | 1.00   |
| Mother's age at birth         | 1.00    | 1.00        | 1.00       | 1.00    | 1.00   | 1.00    | 1.00    | 1.00   |
| Mother's age at b., sq (/100) | 1.00    | 1.00        | 1.00       | 1.00    | 1.00   | 1.00    | 1.00    | 1.00   |
| Father's age at birth         | 1.00    | 1.00        | 1.00       | 1.00    | 1.00   | 1.00    | 1.00    | 1.00   |
| Father's age at b., sq (/100) | 1.00    | 1.00        | 1.00       | 1.00    | 1.00   | 1.00    | 1.00    | 1.00   |
| Age difference parents        | 1.00    | 1.00        | 1.00       | 1.00    | 1.00   | 1.00    | 1.00    | 1.00   |
| Mother out of labor f. (d)    | 1.00    | 1.00        | 1.00       | 1.00    | 1.00   | 1.00    | 1.00    | 1.00   |
| # of children in hh           | 1.00    | 1.00        | 1.00       | 1.00    | 1.00   | 1.00    | 1.00    | 1.00   |
| # of adults in hh             | 1.00    | 1.00        | 1.00       | 1.00    | 1.00   | 1.00    | 1.00    | 1.00   |
| Financial situation           | 1.00    | 1.00        | 1.00       | 1.00    | 1.00   | 1.00    | 1.00    | 1.00   |
| Migrants' children            |         |             |            |         |        |         |         |        |
| Intercept                     | 1.00    | 1.01        | 1.03       | 1.01    | 1.00   | 1.00    | 1.00    | 1.00   |
| Birth year                    | 1.00    | 1.01        | 1.03       | 1.01    | 1.00   | 1.00    | 1.00    | 1.00   |
| Cohort 50s (d)                | 1.00    | 1.01        | 1.03       | 1.00    | 1.00   | 1.00    | 1.00    | 1.00   |
| Cohort 60s (d)                | 1.00    | 1.00        | 1.02       | 1.00    | 1.00   | 1.00    | 1.00    | 1.00   |
| Male (d)                      | 1.00    | 1.00        | 1.00       | 1.00    | 1.00   | 1.00    | 1.00    | 1.00   |
| Mother's age at birth         | 1.00    | 1.00        | 1.00       | 1.00    | 1.00   | 1.00    | 1.00    | 1.00   |
| Mother's age at b., sq (/100) | 1.00    | 1.00        | 1.00       | 1.00    | 1.00   | 1.00    | 1.00    | 1.00   |
| Father's age at birth         | 1.00    | 1.00        | 1.00       | 1.00    | 1.00   | 1.00    | 1.00    | 1.00   |
| Father's age at b., sq (/100) | 1.00    | 1.00        | 1.00       | 1.00    | 1.00   | 1.00    | 1.00    | 1.00   |
| Age difference parents        | 1.00    | 1.00        | 1.00       | 1.00    | 1.00   | 1.00    | 1.00    | 1.00   |
| Mother out of labor f. (d)    | 1.00    | 1.00        | 1.00       | 1.00    | 1.00   | 1.00    | 1.00    | 1.00   |
| # of children in hh           | 1.00    | 1.00        | 1.00       | 1.00    | 1.00   | 1.00    | 1.00    | 1.00   |
| # of adults in hh             | 1.00    | 1.00        | 1.00       | 1.00    | 1.00   | 1.00    | 1.00    | 1.00   |
| Financial situation           | 1.00    | 1.00        | 1.00       | 1.00    | 1.00   | 1.00    | 1.00    | 1.00   |

## D Two classes upward mobility

### D.1 Descriptive statistics

Table D.1: Descriptive statistics of all variables for the sample used for upward mobility

|                            | BE    | CH    | DE    | EE    | FR    | LU    | LV    | UK    |
|----------------------------|-------|-------|-------|-------|-------|-------|-------|-------|
| <i>Natives' children</i>   |       |       |       |       |       |       |       |       |
| Birth year                 | 1964  | 1961  | 1960  | 1961  | 1965  | 1963  | 1962  | 1965  |
| Cohort 50s (d)             | 0.38  | 0.48  | 0.55  | 0.50  | 0.33  | 0.43  | 0.45  | 0.32  |
| Cohort 60s (d)             | 0.35  | 0.36  | 0.30  | 0.36  | 0.34  | 0.35  | 0.35  | 0.34  |
| Male (d)                   | 0.49  | 0.43  | 0.45  | 0.49  | 0.45  | 0.48  | 0.46  | 0.45  |
| Father's age at birth      | 30.76 | 34.14 | 31.44 | 32.86 | 29.81 | 31.63 | 31.58 | 30.11 |
| Mother's age at birth      | 28.16 | 29.77 | 28.69 | 29.35 | 26.97 | 27.94 | 28.94 | 27.12 |
| Age difference parents     | 3.32  | 5.07  | 3.81  | 5.20  | 3.67  | 4.50  | 4.33  | 3.78  |
| Mother out of labor f. (d) | 0.60  | 0.51  | 0.57  | 0.15  | 0.46  | 0.62  | 0.11  | 0.26  |
| # of adults in hh          | 2.49  | 2.94  | 2.47  | 2.37  | 2.48  | 2.73  | 2.23  | 2.33  |
| # of children in hh        | 2.67  | 2.91  | 2.58  | 2.50  | 1.67  | 2.57  | 2.61  | 2.33  |
| Financial situation        | 4.16  | 3.81  | 3.57  | 3.78  | 3.80  | 3.91  | 3.87  | 3.82  |
| <i>Migrants' children</i>  |       |       |       |       |       |       |       |       |
| Birth year                 | 1969  | 1971  | 1966  | 1961  | 1969  | 1972  | 1961  | 1968  |
| Cohort 50s (d)             | 0.28  | 0.13  | 0.37  | 0.46  | 0.20  | 0.08  | 0.45  | 0.20  |
| Cohort 60s (d)             | 0.24  | 0.27  | 0.28  | 0.38  | 0.30  | 0.28  | 0.42  | 0.37  |
| Male (d)                   | 0.51  | 0.46  | 0.48  | 0.49  | 0.52  | 0.55  | 0.51  | 0.41  |
| Father's age at birth      | 32.45 | 31.41 | 32.06 | 31.11 | 32.49 | 30.49 | 31.24 | 32.09 |
| Mother's age at birth      | 27.65 | 27.60 | 27.67 | 29.32 | 27.73 | 27.17 | 29.87 | 28.60 |
| Age difference parents     | 5.31  | 4.61  | 5.09  | 3.95  | 5.18  | 4.31  | 3.19  | 4.65  |
| Mother out of labor f. (d) | 0.72  | 0.32  | 0.44  | 0.08  | 0.57  | 0.49  | 0.06  | 0.36  |
| # of adults in hh          | 2.58  | 2.54  | 2.69  | 2.43  | 2.92  | 2.43  | 2.19  | 2.65  |
| # of children in hh        | 3.19  | 1.93  | 2.43  | 2.05  | 2.11  | 2.53  | 2.71  | 2.91  |
| Financial situation        | 3.69  | 4.15  | 3.78  | 3.96  | 3.72  | 4.08  | 3.73  | 3.85  |

Age difference refers to the absolute age difference between the parents. Mother out of labor force is an indicator whether the respondents' mother was in or out of the labor force when the respondent was 14. # of persons in the household refers to the number of adults and children, respectively, in the household in which the respondents lived when they were 14 years old. Financial situation refers to the financial situation of the household in which the respondents lived when they were 14 years old. A detailed definition of variables can be found in the variable table A.3.

### D.2 Logit coefficients

Table D.2: Logit result for natives' children

|                               | Belgium               | Switzerland           | Germany              | Estonia               | France                | Luxembourg           | Latvia                | UK                    |
|-------------------------------|-----------------------|-----------------------|----------------------|-----------------------|-----------------------|----------------------|-----------------------|-----------------------|
| Intercept                     | 43.680<br>(0.184)     | -71.437<br>(0.395)    | 39.964<br>(0.579)    | 107.728 *<br>(0.077)  | -25.706<br>(0.136)    | -62.772<br>(0.261)   | -15.094<br>(0.776)    | -27.884<br>(0.314)    |
| Birth year                    | -0.024<br>(0.158)     | 0.033<br>(0.437)      | -0.022<br>(0.539)    | -0.055 *<br>(0.169)   | 0.012<br>(0.868)      | 0.027<br>(0.375)     | 0.004<br>(0.868)      | 0.012<br>(0.375)      |
| Cohort 50s (d)                | -0.855 **<br>(0.022)  | 0.699<br>(0.445)      | -1.050<br>(0.188)    | -0.668<br>(0.323)     | -0.432 **<br>(0.030)  | -0.610<br>(0.359)    | 0.107<br>(0.850)      | -0.044<br>(0.890)     |
| Cohort 60s (d)                | -0.317<br>(0.184)     | 0.267<br>(0.651)      | -0.456<br>(0.365)    | -0.253<br>(0.565)     | -0.328 **<br>(0.011)  | -0.584<br>(0.183)    | 0.128<br>(0.728)      | 0.007<br>(0.975)      |
| Gender (d)                    | -0.182<br>(0.106)     | 0.890 ***<br>(0.001)  | 1.056 ***<br>(0.000) | -1.015 ***<br>(0.000) | -0.141 **<br>(0.023)  | 0.319<br>(0.100)     | -0.991 ***<br>(0.000) | 0.140<br>(0.124)      |
| Mother's age at birth         | 0.052<br>(0.578)      | -0.343 *<br>(0.093)   | -0.165<br>(0.285)    | -0.046<br>(0.730)     | 0.136 **<br>(0.013)   | 0.395 *<br>(0.054)   | 0.122<br>(0.292)      | 0.112 *<br>(0.099)    |
| Mother's age at b., sq (/100) | -0.054<br>(0.707)     | 0.500 *<br>(0.089)    | 0.251<br>(0.321)     | 0.112<br>(0.595)      | -0.201 **<br>(0.032)  | -0.629 *<br>(0.056)  | -0.164<br>(0.372)     | -0.182 *<br>(0.099)   |
| Father's age at birth         | 0.090<br>(0.295)      | 0.514 ***<br>(0.005)  | 0.339 **<br>(0.013)  | 0.101<br>(0.304)      | -0.028<br>(0.527)     | 0.109<br>(0.429)     | 0.184 **<br>(0.028)   | 0.040<br>(0.449)      |
| Father's age at b., sq (/100) | -0.137<br>(0.281)     | -0.705 ***<br>(0.003) | -0.453 **<br>(0.022) | -0.154<br>(0.260)     | 0.043<br>(0.514)      | -0.104<br>(0.592)    | -0.254 **<br>(0.039)  | -0.015<br>(0.839)     |
| Age difference parents        | -0.015<br>(0.553)     | 0.081<br>(0.219)      | 0.047<br>(0.308)     | -0.004<br>(0.882)     | -0.016<br>(0.311)     | -0.057<br>(0.308)    | 0.013<br>(0.616)      | -0.023<br>(0.286)     |
| Mother out of labor f. (d)    | -0.072<br>(0.516)     | 0.028<br>(0.917)      | -0.100<br>(0.639)    | -0.105<br>(0.697)     | 0.013<br>(0.836)      | -0.047<br>(0.820)    | 0.147<br>(0.552)      | 0.040<br>(0.715)      |
| # of children in hh           | -0.080 **<br>(0.034)  | -0.244 ***<br>(0.010) | -0.066<br>(0.343)    | -0.270 ***<br>(0.001) | -0.210 ***<br>(0.000) | -0.111<br>(0.134)    | -0.196 ***<br>(0.004) | -0.059<br>(0.140)     |
| # of adults in hh             | -0.158 ***<br>(0.008) | -0.017<br>(0.851)     | 0.071<br>(0.376)     | -0.264 **<br>(0.026)  | -0.223 ***<br>(0.000) | -0.200 **<br>(0.040) | -0.247 *<br>(0.060)   | -0.177 ***<br>(0.002) |
| Financial situation           | 0.045<br>(0.421)      | 0.177<br>(0.106)      | -0.152 *<br>(0.100)  | 0.124<br>(0.243)      | 0.128 ***<br>(0.000)  | 0.125<br>(0.177)     | 0.158 *<br>(0.084)    | 0.120 ***<br>(0.010)  |
| N                             | 1781                  | 630                   | 545                  | 836                   | 5493                  | 1088                 | 1316                  | 2289                  |

The table reports logit coefficients. p-value based on equation (3) in parenthesis. \*\*\*, (\*\*), [\*] signify significance of the effects at the 1%, (5%), [10%] level, respectively, based on equation (4). (d) indicates that the variable is a dummy variable. For dummy variables the reported effect refers to a discrete change of the variable from 0 to 1.

Table D.3: Logit result for migrants' children

|                               | Belgium              | Switzerland         | Germany               | Estonia               | France               | Luxembourg            | Latvia                | UK                 |
|-------------------------------|----------------------|---------------------|-----------------------|-----------------------|----------------------|-----------------------|-----------------------|--------------------|
| Intercept                     | 53.419<br>(0.786)    | -159.820<br>(0.305) | -601.341 *<br>(0.051) | 697.057 **<br>(0.032) | 50.333<br>(0.471)    | 69.114<br>(0.481)     | 73.280<br>(0.706)     | -84.799<br>(0.581) |
| Birth year                    | -0.029<br>(0.772)    | 0.073<br>(0.353)    | 0.302 *<br>(0.052)    | -0.360 **<br>(0.030)  | -0.027<br>(0.449)    | -0.042<br>(0.394)     | -0.049<br>(0.622)     | 0.048<br>(0.536)   |
| Cohort 50s (d)                | -1.118<br>(0.638)    | 1.486<br>(0.399)    | 6.902 *<br>(0.068)    | -7.020 **<br>(0.026)  | -0.622<br>(0.451)    | -2.221<br>(0.124)     | 0.266<br>(0.905)      | -0.329<br>(0.853)  |
| Cohort 60s (d)                | -1.412<br>(0.377)    | 0.128<br>(0.907)    | 4.601<br>(0.107)      | -2.874<br>(0.151)     | -0.443<br>(0.396)    | -1.965 **<br>(0.021)  | -0.029<br>(0.985)     | 0.243<br>(0.821)   |
| Gender (d)                    | -0.131<br>(0.841)    | 1.442 **<br>(0.018) | 0.324<br>(0.763)      | -2.181 **<br>(0.017)  | -0.357<br>(0.172)    | 0.979 **<br>(0.030)   | -1.710 ***<br>(0.006) | -0.454<br>(0.404)  |
| Mother's age at birth         | -0.212<br>(0.652)    | 0.681<br>(0.398)    | -0.575<br>(0.613)     | -0.768<br>(0.331)     | -0.139<br>(0.513)    | 1.049 **<br>(0.015)   | 0.944<br>(0.134)      | -0.740<br>(0.105)  |
| Mother's age at b., sq (/100) | 0.405<br>(0.544)     | -1.970<br>(0.131)   | 0.477<br>(0.815)      | 0.980<br>(0.456)      | 0.070<br>(0.819)     | -1.823 ***<br>(0.010) | -1.507<br>(0.145)     | 0.921<br>(0.217)   |
| Father's age at birth         | 0.362<br>(0.447)     | 0.418<br>(0.538)    | 1.118<br>(0.213)      | 1.558 *<br>(0.079)    | 0.299<br>(0.148)     | -0.146<br>(0.585)     | 0.318<br>(0.496)      | 0.111<br>(0.761)   |
| Father's age at b., sq (/100) | -0.406<br>(0.466)    | 0.192<br>(0.846)    | -1.289<br>(0.346)     | -2.185<br>(0.116)     | -0.243<br>(0.324)    | 0.415<br>(0.305)      | -0.479<br>(0.498)     | 0.045<br>(0.933)   |
| Age difference parents        | 0.021<br>(0.911)     | -0.511<br>(0.212)   | -0.565<br>(0.125)     | -0.062<br>(0.699)     | -0.102<br>(0.362)    | -0.167<br>(0.173)     | 0.040<br>(0.703)      | -0.117<br>(0.367)  |
| Mother out of labor f. (d)    | 0.996<br>(0.270)     | 0.086<br>(0.899)    | -0.051<br>(0.962)     | -913.875<br>(0.449)   | -0.565 **<br>(0.048) | 0.464<br>(0.298)      | -0.006<br>(0.995)     | -0.183<br>(0.748)  |
| # of children in hh           | -0.644 **<br>(0.011) | -0.249<br>(0.456)   | -0.030<br>(0.933)     | -0.518<br>(0.295)     | 0.027<br>(0.721)     | -0.352 *<br>(0.062)   | -0.233<br>(0.334)     | -0.015<br>(0.938)  |
| # of adults in hh             | -1.109 **<br>(0.012) | -0.754 *<br>(0.069) | -1.331 **<br>(0.028)  | -0.320<br>(0.585)     | -0.172 *<br>(0.053)  | -0.291<br>(0.288)     | 0.189<br>(0.667)      | -0.213<br>(0.383)  |
| Financial situation           | 0.288<br>(0.309)     | -0.244<br>(0.394)   | -0.337<br>(0.511)     | 0.536<br>(0.365)      | -0.198<br>(0.102)    | -0.046<br>(0.855)     | 0.203<br>(0.497)      | 0.087<br>(0.739)   |
| N                             | 101                  | 127                 | 54                    | 79                    | 340                  | 240                   | 170                   | 86                 |

The table reports logit coefficients. p-value based on equation (3) in parenthesis. \*\*\*, (\*\*), [\*] signify significance of the effects at the 1%, (5%), [10%] level, respectively, based on equation (4). (d) indicates that the variable is a dummy variable. For dummy variables the reported effect refers to a discrete change of the variable from 0 to 1.

### D.3 Logit results - marginal effects

Table D.4: Logit result for natives' children (marginal effects)

|                               | Belgium               | Switzerland           | Germany              | Estonia               | France                | Luxembourg           | Latvia                | UK                    |
|-------------------------------|-----------------------|-----------------------|----------------------|-----------------------|-----------------------|----------------------|-----------------------|-----------------------|
| Intercept                     | 8.095<br>(0.183)      | -7.385<br>(0.393)     | 6.965<br>(0.579)     | 15.594 *<br>(0.075)   | -4.572<br>(0.136)     | -5.955<br>(0.262)    | -1.855<br>(0.776)     | -5.666<br>(0.314)     |
| Birth year                    | -0.004<br>(0.157)     | 0.003<br>(0.435)      | -0.004<br>(0.540)    | -0.008 *<br>(0.070)   | 0.002<br>(0.169)      | 0.003<br>(0.339)     | 0.001<br>(0.869)      | 0.003<br>(0.375)      |
| Cohort 50s (d)                | -0.148 **<br>(0.015)  | 0.076<br>(0.443)      | -0.180<br>(0.170)    | -0.096<br>(0.316)     | -0.074 **<br>(0.025)  | -0.056<br>(0.377)    | 0.014<br>(0.842)      | -0.008<br>(0.904)     |
| Cohort 60s (d)                | -0.056<br>(0.178)     | 0.032<br>(0.630)      | -0.072<br>(0.371)    | -0.034<br>(0.577)     | -0.057 ***<br>(0.009) | -0.052<br>(0.184)    | 0.017<br>(0.710)      | 0.002<br>(0.966)      |
| Gender (d)                    | -0.034<br>(0.105)     | 0.095 ***<br>(0.001)  | 0.192 ***<br>(0.000) | -0.146 ***<br>(0.000) | -0.025 **<br>(0.022)  | 0.030<br>(0.100)     | -0.118 ***<br>(0.000) | 0.029<br>(0.124)      |
| Mother's age at birth         | 0.010<br>(0.579)      | -0.035 *<br>(0.093)   | -0.029<br>(0.282)    | -0.007<br>(0.732)     | 0.024 **<br>(0.013)   | 0.038 *<br>(0.056)   | 0.015<br>(0.292)      | 0.023 *<br>(0.099)    |
| Mother's age at b., sq (/100) | -0.010<br>(0.708)     | 0.052 *<br>(0.089)    | 0.044<br>(0.318)     | 0.016<br>(0.598)      | -0.036 **<br>(0.032)  | -0.060 *<br>(0.058)  | -0.020<br>(0.371)     | -0.037 *<br>(0.098)   |
| Father's age at birth         | 0.017<br>(0.294)      | 0.053 ***<br>(0.005)  | 0.059 **<br>(0.012)  | 0.015<br>(0.304)      | -0.005<br>(0.528)     | 0.010<br>(0.431)     | 0.023 **<br>(0.027)   | 0.008<br>(0.449)      |
| Father's age at b., sq (/100) | -0.025<br>(0.280)     | -0.073 ***<br>(0.003) | -0.079 **<br>(0.020) | -0.022<br>(0.261)     | 0.008<br>(0.515)      | -0.010<br>(0.593)    | -0.031 **<br>(0.037)  | -0.003<br>(0.838)     |
| Age difference parents        | -0.003<br>(0.554)     | 0.008<br>(0.221)      | 0.008<br>(0.307)     | -0.001<br>(0.880)     | -0.003<br>(0.311)     | -0.005<br>(0.307)    | 0.002<br>(0.618)      | -0.005<br>(0.287)     |
| Mother out of labor f. (d)    | -0.013<br>(0.514)     | 0.003<br>(0.916)      | -0.018<br>(0.636)    | -0.013<br>(0.731)     | 0.002<br>(0.836)      | -0.005<br>(0.811)    | 0.021<br>(0.524)      | 0.008<br>(0.709)      |
| # of children in hh           | -0.015 **<br>(0.033)  | -0.025 ***<br>(0.009) | -0.011<br>(0.344)    | -0.039 ***<br>(0.001) | -0.037 ***<br>(0.000) | -0.010<br>(0.136)    | -0.024 ***<br>(0.004) | -0.012<br>(0.139)     |
| # of adults in hh             | -0.029 ***<br>(0.007) | -0.002<br>(0.853)     | 0.012<br>(0.375)     | -0.038 **<br>(0.025)  | -0.040 ***<br>(0.000) | -0.019 **<br>(0.041) | -0.031 *<br>(0.059)   | -0.036 ***<br>(0.002) |
| Financial situation           | 0.008<br>(0.420)      | 0.018<br>(0.105)      | -0.027 *<br>(0.100)  | 0.018<br>(0.242)      | 0.023 ***<br>(0.000)  | 0.012<br>(0.178)     | 0.020 *<br>(0.083)    | 0.024 ***<br>(0.009)  |
| N                             | 1781                  | 630                   | 545                  | 836                   | 5493                  | 1088                 | 1316                  | 2289                  |

The table reports average marginal effects. The constant term is not shown. p-value based on equation (3) in parenthesis. \*\*\*, (\*\*), [\*] signify significance of the effects at the 1%, (5%), [10%] level, respectively, based on equation (4). (d) indicates that the variable is a dummy variable. For dummy variables the reported effect refers to a discrete change of the variable from 0 to 1.

Table D.5: Logit results for migrants' children (marginal effects)

|                               | Belgium               | Switzerland         | Germany               | Estonia               | France               | Luxembourg            | Latvia                | UK                  |
|-------------------------------|-----------------------|---------------------|-----------------------|-----------------------|----------------------|-----------------------|-----------------------|---------------------|
| Intercept                     | 6.033<br>(0.786)      | -17.267<br>(0.308)  | -68.726 **<br>(0.027) | 67.912 **<br>(0.021)  | 9.408<br>(0.471)     | 7.322<br>(0.484)      | 7.026<br>(0.705)      | -15.553<br>(0.579)  |
| Birth year                    | -0.003<br>(0.773)     | 0.008<br>(0.356)    | 0.034 **<br>(0.027)   | -0.035 **<br>(0.020)  | -0.005<br>(0.450)    | -0.004<br>(0.396)     | -0.005<br>(0.621)     | 0.009<br>(0.534)    |
| Cohort 50s (d)                | -0.071<br>(0.738)     | 0.210<br>(0.338)    | 0.469 ***<br>(0.003)  | -0.430 ***<br>(0.000) | -0.090<br>(0.482)    | -0.125 *<br>(0.064)   | 0.032<br>(0.875)      | -0.058<br>(0.824)   |
| Cohort 60s (d)                | -0.116<br>(0.408)     | 0.025<br>(0.834)    | 0.395 **<br>(0.030)   | -0.203 *<br>(0.093)   | -0.076<br>(0.398)    | -0.163 ***<br>(0.006) | 0.000<br>(1.000)      | 0.040<br>(0.826)    |
| Gender (d)                    | -0.014<br>(0.850)     | 0.160 **<br>(0.013) | 0.041<br>(0.740)      | -0.211 ***<br>(0.008) | -0.068<br>(0.172)    | 0.101 **<br>(0.025)   | -0.152 ***<br>(0.002) | -0.086<br>(0.400)   |
| Mother's age at birth         | -0.024<br>(0.657)     | 0.074<br>(0.403)    | -0.067<br>(0.610)     | -0.075<br>(0.331)     | -0.026<br>(0.511)    | 0.111 **<br>(0.013)   | 0.090<br>(0.136)      | -0.136 *<br>(0.094) |
| Mother's age at b., sq (/100) | 0.046<br>(0.552)      | -0.214<br>(0.130)   | 0.055<br>(0.815)      | 0.096<br>(0.458)      | 0.013<br>(0.821)     | -0.193 ***<br>(0.009) | -0.143<br>(0.149)     | 0.168<br>(0.210)    |
| Father's age at birth         | 0.040<br>(0.447)      | 0.046<br>(0.539)    | 0.131<br>(0.208)      | 0.152 *<br>(0.072)    | 0.056<br>(0.145)     | -0.015<br>(0.593)     | 0.030<br>(0.505)      | 0.021<br>(0.761)    |
| Father's age at b., sq (/100) | -0.045<br>(0.466)     | 0.021<br>(0.846)    | -0.150<br>(0.345)     | -0.213<br>(0.110)     | -0.046<br>(0.324)    | 0.044<br>(0.307)      | -0.046<br>(0.508)     | 0.008<br>(0.934)    |
| Age difference parents        | 0.002<br>(0.911)      | -0.056<br>(0.216)   | -0.066<br>(0.118)     | -0.006<br>(0.699)     | -0.019<br>(0.360)    | -0.018<br>(0.173)     | 0.004<br>(0.703)      | -0.022<br>(0.361)   |
| Mother out of labor f. (d)    | 0.095<br>(0.267)      | 0.013<br>(0.863)    | -0.003<br>(0.979)     | -0.217 ***<br>(0.000) | -0.108 **<br>(0.047) | 0.049<br>(0.297)      | 0.022<br>(0.829)      | -0.034<br>(0.740)   |
| # of children in hh           | -0.072 ***<br>(0.005) | -0.027<br>(0.458)   | -0.004<br>(0.932)     | -0.050<br>(0.295)     | 0.005<br>(0.721)     | -0.037 *<br>(0.058)   | -0.022<br>(0.337)     | -0.003<br>(0.938)   |
| # of adults in hh             | -0.124 ***<br>(0.008) | -0.082 *<br>(0.063) | -0.153 **<br>(0.011)  | -0.031<br>(0.590)     | -0.032 *<br>(0.050)  | -0.031<br>(0.288)     | 0.018<br>(0.663)      | -0.039<br>(0.376)   |
| Financial situation           | 0.032<br>(0.308)      | -0.026<br>(0.387)   | -0.039<br>(0.507)     | 0.052<br>(0.372)      | -0.037 *<br>(0.100)  | -0.005<br>(0.854)     | 0.019<br>(0.493)      | 0.016<br>(0.738)    |
| N                             | 101                   | 127                 | 54                    | 79                    | 340                  | 240                   | 170                   | 86                  |

The table reports average marginal effects. The constant term is not shown. p-value based on equation (3) in parenthesis. \*\*\*, (\*\*), [\*] signify significance of the effects at the 1%, (5%), [10%] level, respectively, based on equation (4). (d) indicates that the variable is a dummy variable. For dummy variables the reported effect refers to a discrete change of the variable from 0 to 1.

## D.4 Gelman statistics

Table D.6: Gelman statistics

|                               | Belgium | Switzerland | Germany | Estonia | France | Luxembourg | Latvia | UK    |
|-------------------------------|---------|-------------|---------|---------|--------|------------|--------|-------|
| Natives' children             |         |             |         |         |        |            |        |       |
| Intercept                     | 1.000   | 1.000       | 1.000   | 1.000   | 1.000  | 1.000      | 1.000  | 1.000 |
| Birth year                    | 1.000   | 1.000       | 1.000   | 1.000   | 1.000  | 1.000      | 1.000  | 1.000 |
| Cohort 50s (d)                | 1.000   | 1.000       | 1.000   | 1.000   | 1.000  | 1.000      | 1.000  | 1.000 |
| Cohort 60s (d)                | 1.000   | 1.000       | 1.000   | 1.000   | 1.000  | 1.000      | 1.000  | 1.000 |
| Male (d)                      | 1.000   | 1.000       | 1.000   | 1.000   | 1.000  | 1.000      | 1.000  | 1.000 |
| Mother's age at birth         | 1.000   | 1.000       | 1.000   | 1.000   | 1.000  | 1.000      | 1.000  | 1.000 |
| Mother's age at b., sq (/100) | 1.000   | 1.000       | 1.000   | 1.000   | 1.000  | 1.000      | 1.000  | 1.000 |
| Father's age at birth         | 1.000   | 1.001       | 1.000   | 1.000   | 1.000  | 1.000      | 1.000  | 1.000 |
| Father's age at b., sq (/100) | 1.000   | 1.001       | 1.000   | 1.000   | 1.000  | 1.001      | 1.000  | 1.000 |
| Age difference parents        | 1.001   | 1.000       | 1.000   | 1.000   | 1.000  | 1.000      | 1.000  | 1.000 |
| Mother out of labor f. (d)    | 1.000   | 1.000       | 1.000   | 1.000   | 1.000  | 1.000      | 1.000  | 1.000 |
| # of children in hh           | 1.000   | 1.000       | 1.000   | 1.000   | 1.000  | 1.001      | 1.000  | 1.000 |
| # of adults in hh             | 1.000   | 1.000       | 1.000   | 1.000   | 1.000  | 1.000      | 1.000  | 1.000 |
| Financial situation           | 1.000   | 1.000       | 1.000   | 1.000   | 1.000  | 1.000      | 1.000  | 1.000 |
| Migrants' children            |         |             |         |         |        |            |        |       |
| Intercept                     | 1.001   | 1.000       | 1.016   | 1.031   | 1.000  | 1.000      | 1.001  | 1.000 |
| Birth year                    | 1.001   | 1.000       | 1.016   | 1.031   | 1.000  | 1.000      | 1.001  | 1.000 |
| Cohort 50s (d)                | 1.001   | 1.000       | 1.014   | 1.026   | 1.001  | 1.001      | 1.001  | 1.000 |
| Cohort 60s (d)                | 1.000   | 1.001       | 1.013   | 1.020   | 1.000  | 1.000      | 1.000  | 1.000 |
| Male (d)                      | 1.000   | 1.000       | 1.000   | 1.002   | 1.000  | 1.000      | 1.000  | 1.000 |
| Mother's age at birth         | 1.000   | 1.001       | 1.000   | 1.000   | 1.000  | 1.001      | 1.000  | 1.000 |
| Mother's age at b., sq (/100) | 1.000   | 1.000       | 1.000   | 1.000   | 1.000  | 1.001      | 1.001  | 1.000 |
| Father's age at birth         | 1.000   | 1.001       | 1.001   | 1.001   | 1.001  | 1.000      | 1.000  | 1.000 |
| Father's age at b., sq (/100) | 1.000   | 1.003       | 1.001   | 1.001   | 1.000  | 1.000      | 1.000  | 1.000 |
| Age difference parents        | 1.000   | 1.000       | 1.001   | 2.044   | 1.000  | 1.000      | 1.000  | 1.000 |
| Mother out of labor f. (d)    | 1.000   | 1.000       | 1.000   | 1.001   | 1.000  | 1.000      | 1.000  | 1.000 |
| # of children in hh           | 1.000   | 1.000       | 1.000   | 1.001   | 1.000  | 1.000      | 1.000  | 1.000 |
| # of adults in hh             | 1.001   | 1.000       | 1.000   | 1.001   | 1.000  | 1.000      | 1.000  | 1.000 |
| Financial situation           | 1.000   | 1.000       | 1.000   | 1.001   | 1.001  | 1.000      | 1.000  | 1.000 |

## E Selection

### E.1 Dropped observations

Table E.1: Sample sizes

|    |       | Full sample in EU-SILC | born in country of residence | finished education | parental information available | resulting sample | nonmissing observations | upward mobility | without ISCED 5-6 parental educ | downward mobility | without illiterate parents | conditional upward mobility | max. ISCED 0-2 parental educ |
|----|-------|------------------------|------------------------------|--------------------|--------------------------------|------------------|-------------------------|-----------------|---------------------------------|-------------------|----------------------------|-----------------------------|------------------------------|
|    |       | N                      | percentage dropped (%)       |                    |                                | N                | (%)                     | (%)             | N                               | (%)               | N                          | (%)                         | N                            |
| AT | total | 13933                  | -29%                         | -10%               | -44%                           | 5019             | -5%                     | -16%            | 3990                            | 0%                | 4745                       |                             |                              |
|    | nat   |                        |                              |                    |                                | 4905             | -5%                     | -16%            | 3903                            | 0%                | 4639                       |                             |                              |
|    | mig   |                        |                              |                    |                                | 114              | -7%                     | -18%            | 87                              | 0%                | 106                        |                             |                              |
| BE | total | 14300                  | -33%                         | -12%               | -47%                           | 4458             | -8%                     | -26%            | 3051                            |                   |                            | -54%                        | 1882                         |
|    | nat   |                        |                              |                    |                                | 4300             | -8%                     | -27%            | 2911                            |                   |                            | -55%                        | 1781                         |
|    | mig   |                        |                              |                    |                                | 158              | -7%                     | -5%             | 140                             |                   |                            | -31%                        | 101                          |
| CH | total | 17602                  | -39%                         | -12%               | -47%                           | 4982             | -11%                    | -15%            | 3736                            | 0%                | 4395                       | -83%                        | 757                          |
|    | nat   |                        |                              |                    |                                | 4604             | -11%                    | -15%            | 3455                            | 0%                | 4078                       | -85%                        | 630                          |
|    | mig   |                        |                              |                    |                                | 378              | -11%                    | -16%            | 281                             | -5%               | 317                        | -62%                        | 127                          |
| CZ | total | 20629                  | -18%                         | -10%               | -59%                           | 6247             | -1%                     | -11%            | 5518                            |                   |                            | -43%                        | 3509                         |
|    | nat   |                        |                              |                    |                                | 6142             | -1%                     | -11%            | 5415                            |                   |                            | -44%                        | 3428                         |
|    | mig   |                        |                              |                    |                                | 105              | 0%                      | -2%             | 103                             |                   |                            | -23%                        | 81                           |
| DE | total | 28644                  | -23%                         | -9%                | -47%                           | 10568            | -23%                    | -32%            | 5514                            | 0%                | 8154                       |                             |                              |
|    | nat   |                        |                              |                    |                                | 10304            | -23%                    | -33%            | 5361                            | 0%                | 7955                       |                             |                              |
|    | mig   |                        |                              |                    |                                | 264              | -25%                    | -23%            | 153                             | 0%                | 199                        |                             |                              |
| EE | total | 13426                  | -28%                         | -16%               | -50%                           | 4071             | -14%                    | -25%            | 2617                            | 0%                | 3505                       | -74%                        | 915                          |
|    | nat   |                        |                              |                    |                                | 3653             | -14%                    | -24%            | 2378                            | 0%                | 3148                       | -73%                        | 836                          |
|    | mig   |                        |                              |                    |                                | 418              | -15%                    | -33%            | 239                             | 0%                | 357                        | -78%                        | 79                           |
| FR | total | 27071                  | -28%                         | -9%                | -46%                           | 9520             | -15%                    | -15%            | 6886                            | -1%               | 8013                       | -28%                        | 5833                         |
|    | nat   |                        |                              |                    |                                | 8980             | -15%                    | -15%            | 6466                            | 0%                | 7605                       | -28%                        | 5493                         |
|    | mig   |                        |                              |                    |                                | 540              | -17%                    | -7%             | 420                             | -9%               | 408                        | -24%                        | 340                          |
| HR | total | 16948                  | -24%                         | -9%                | -53%                           | 5507             | -16%                    | -8%             | 4243                            | 0%                | 4609                       | -47%                        | 2446                         |
|    | nat   |                        |                              |                    |                                | 5225             | -16%                    | -8%             | 4024                            | 0%                | 4374                       | -47%                        | 2309                         |
|    | mig   |                        |                              |                    |                                | 282              | -16%                    | -7%             | 219                             | 0%                | 235                        | -42%                        | 137                          |
| LU | total | 14891                  | -57%                         | -14%               | -40%                           | 3317             | -5%                     | -10%            | 2835                            | 0%                | 3142                       | -58%                        | 1328                         |
|    | nat   |                        |                              |                    |                                | 2938             | -5%                     | -10%            | 2503                            | 0%                | 2784                       | -61%                        | 1088                         |
|    | mig   |                        |                              |                    |                                | 379              | -5%                     | -8%             | 332                             | -1%               | 358                        | -33%                        | 240                          |
| LV | total | 15891                  | -28%                         | -11%               | -55%                           | 4618             | -8%                     | -19%            | 3468                            | 0%                | 4251                       | -65%                        | 1486                         |
|    | nat   |                        |                              |                    |                                | 4079             | -8%                     | -19%            | 3059                            | 0%                | 3751                       | -65%                        | 1316                         |
|    | mig   |                        |                              |                    |                                | 539              | -7%                     | -18%            | 409                             | 0%                | 500                        | -66%                        | 170                          |
| UK | total | 18670                  | -29%                         | -9%                | -56%                           | 5315             | -14%                    | -22%            | 3582                            |                   |                            |                             |                              |
|    | nat   |                        |                              |                    |                                | 5145             | -14%                    | -22%            | 3466                            |                   |                            |                             |                              |
|    | mig   |                        |                              |                    |                                | 170              | -13%                    | -22%            | 116                             |                   |                            |                             |                              |

The table shows the shares of observations dropped to obtain the final samples. We restrict the sample to persons born in their country of residence, with finished education. We have to drop observations with missing information on the respondents' parents and household characteristics at the age of 14 (i.e. if information on parental country of birth or education is missing, if parents are coded as dead or unknown in EU-SILC or the respondent was living in a collective household or institution). From the resulting sample we have to drop all individuals with missing information on the dependent or independent variables used in the empirical analysis. For the analysis of upward mobility we exclude respondents whose more highly educated parent already reached the highest education level (ISCED 5-6). For the analysis of downward mobility we exclude respondents whose parents are illiterate. For the analysis of upward mobility conditional on parental education we focus on respondents whose more highly educated parent has an education level corresponding to ISCED 0-2. Country-codes: AT=Austria, BE=Belgium, CH=Switzerland, CZ=Czech Republic, DE=Germany, EE=Estonia, FR=France, HR=Croatia, LU=Luxemburg, LV=Latvia, UK=United Kingdom.

## E.2 Mobility patterns of dropped observations

Table E.2: Mobility of dropped individuals due to missing values for explanatory variables

|                                             | migrants | natives | mobility gap | migrants | natives | mobility gap | migrants    | natives | mobility gap | migrants         | natives | mobility gap |
|---------------------------------------------|----------|---------|--------------|----------|---------|--------------|-------------|---------|--------------|------------------|---------|--------------|
|                                             | upward   |         |              | downward |         |              | upward cond |         |              | upward 2 classes |         |              |
| <i>Sample without dropping observations</i> |          |         |              |          |         |              |             |         |              |                  |         |              |
| AT                                          | 51%      | 44%     | 6%           | 14%      | 11%     | 3%           |             |         |              |                  |         |              |
| BE                                          | 72%      | 61%     | 11%          |          |         |              | 76%         | 70%     | 6%           | 21%              | 25%     | -3%          |
| CH                                          | 61%      | 38%     | 23%          | 8%       | 8%      | -1%          | 90%         | 84%     | 7%           | 16%              | 14%     | 3%           |
| CZ                                          | 69%      | 66%     | 3%           |          |         |              | 77%         | 90%     | -13%         |                  |         |              |
| DE                                          | 50%      | 39%     | 11%          | 10%      | 14%     | -4%          |             |         |              | 28%              | 24%     | 4%           |
| EE                                          | 46%      | 48%     | -2%          | 21%      | 16%     | 5%           | 81%         | 81%     | 0%           | 17%              | 19%     | -3%          |
| FR                                          | 81%      | 77%     | 5%           | 3%       | 5%      | -2%          | 81%         | 80%     | 1%           | 26%              | 24%     | 2%           |
| HR                                          | 54%      | 49%     | 5%           | 6%       | 6%      | 0%           | 67%         | 68%     | 0%           |                  |         |              |
| LU                                          | 59%      | 40%     | 19%          | 7%       | 13%     | -7%          | 72%         | 57%     | 14%          | 15%              | 11%     | 4%           |
| LV                                          | 47%      | 52%     | -5%          | 14%      | 13%     | 1%           | 84%         | 79%     | 4%           | 13%              | 15%     | -2%          |
| UK                                          | 87%      | 72%     | 16%          |          |         |              |             |         |              | 44%              | 28%     | 16%          |
| <i>Dropped observations</i>                 |          |         |              |          |         |              |             |         |              |                  |         |              |
| AT                                          | 88%      | 39%     | 49%          | 0%       | 12%     | -12%         |             |         |              |                  |         |              |
| BE                                          | 78%      | 49%     | 29%          |          |         |              | 83%         | 55%     | 29%          | 0%               | 14%     | -14%         |
| CH                                          | 54%      | 39%     | 15%          | 17%      | 9%      | 8%           | 75%         | 83%     | -8%          | 10%              | 15%     | -5%          |
| CZ                                          |          | 78%     | -78%         |          |         |              |             | 93%     | -93%         |                  |         |              |
| DE                                          | 39%      | 36%     | 3%           | 20%      | 13%     | 7%           |             |         |              | 20%              | 20%     | 0%           |
| EE                                          | 50%      | 43%     | 7%           | 20%      | 15%     | 4%           | 78%         | 70%     | 8%           | 4%               | 17%     | -12%         |
| FR                                          | 77%      | 74%     | 3%           | 4%       | 4%      | 0%           | 72%         | 76%     | -4%          | 14%              | 17%     | -3%          |
| HR                                          | 50%      | 52%     | -2%          | 5%       | 5%      | -1%          | 56%         | 65%     | -9%          |                  |         |              |
| LU                                          | 56%      | 32%     | 24%          | 6%       | 19%     | -14%         | 83%         | 48%     | 35%          | 8%               | 4%      | 4%           |
| LV                                          | 48%      | 49%     | -1%          | 10%      | 13%     | -3%          | 83%         | 73%     | 10%          | 0%               | 5%      | -5%          |
| UK                                          | 68%      | 70%     | -2%          |          |         |              |             |         |              | 31%              | 18%     | 12%          |
| <i>Final sample</i>                         |          |         |              |          |         |              |             |         |              |                  |         |              |
| AT                                          | 47%      | 44%     | 3%           | 15%      | 11%     | 4%           |             |         |              |                  |         |              |
| BE                                          | 71%      | 62%     | 9%           |          |         |              | 75%         | 71%     | 4%           | 23%              | 26%     | -3%          |
| CH                                          | 62%      | 38%     | 24%          | 6%       | 8%      | -2%          | 93%         | 84%     | 9%           | 17%              | 13%     | 4%           |
| CZ                                          | 69%      | 66%     | 3%           |          |         |              | 77%         | 90%     | -13%         |                  |         |              |
| DE                                          | 54%      | 40%     | 14%          | 7%       | 15%     | -7%          |             |         |              | 31%              | 27%     | 5%           |
| EE                                          | 45%      | 48%     | -4%          | 21%      | 16%     | 5%           | 82%         | 84%     | -1%          | 20%              | 20%     | 0%           |
| FR                                          | 82%      | 77%     | 5%           | 3%       | 5%      | -2%          | 83%         | 80%     | 2%           | 29%              | 25%     | 4%           |
| HR                                          | 55%      | 48%     | 6%           | 6%       | 6%      | 0%           | 70%         | 68%     | 2%           |                  |         |              |
| LU                                          | 59%      | 40%     | 18%          | 7%       | 13%     | -6%          | 71%         | 58%     | 13%          | 15%              | 12%     | 4%           |
| LV                                          | 47%      | 52%     | -6%          | 15%      | 13%     | 1%           | 84%         | 80%     | 4%           | 14%              | 16%     | -2%          |
| UK                                          | 91%      | 72%     | 19%          |          |         |              |             |         |              | 47%              | 30%     | 17%          |

The table shows mobility patterns of natives and second generation migrants. The *sample without dropping observations* refers to mobility patterns present in the sample before dropping individuals with missing information on any explanatory variable used in the multivariate analysis of the paper. The panel labeled *dropped observations* summarizes the mobility patterns of natives and second generation migrants of individuals that are dropped due to missing information on any explanatory variable used. The panel labeled *final sample* summarizes the mobility patterns of the sample after dropping individuals with missing values on explanatory variables, which is used in the multivariate analysis in the paper.

Table E.3: Summary of mobility of dropped individuals

|    | migrants                                                        | natives | bias in mobility gap | migrants | natives | bias in mobility gap | migrants    | natives | bias in mobility gap | migrants         | natives | bias in mobility gap |
|----|-----------------------------------------------------------------|---------|----------------------|----------|---------|----------------------|-------------|---------|----------------------|------------------|---------|----------------------|
|    | upward                                                          |         |                      | downward |         |                      | upward cond |         |                      | upward 2 classes |         |                      |
|    | <i>Dropped observations and potential bias in mobility gaps</i> |         |                      |          |         |                      |             |         |                      |                  |         |                      |
| AT | 88%                                                             | 39%     | -4%                  | 0%       | 12%     | 1%                   |             |         |                      |                  |         |                      |
| BE | 78%                                                             | 49%     | -1%                  |          |         |                      | 83%         | 55%     | -2%                  | 0%               | 14%     | 0%                   |
| CH | 54%                                                             | 39%     | 1%                   | 17%      | 9%      | -1%                  | 75%         | 83%     | 2%                   | 10%              | 15%     | 1%                   |
| CZ |                                                                 | 78%     | 0%                   |          |         |                      |             | 93%     | 0%                   |                  |         |                      |
| DE | 39%                                                             | 36%     | 3%                   | 20%      | 13%     | -3%                  |             |         |                      | 20%              | 20%     | 0%                   |
| EE | 50%                                                             | 43%     | -2%                  | 20%      | 15%     | 0%                   | 78%         | 70%     | -2%                  | 4%               | 17%     | 3%                   |
| FR | 77%                                                             | 74%     | 0%                   | 4%       | 4%      | 0%                   | 72%         | 76%     | 1%                   | 14%              | 17%     | 1%                   |
| HR | 50%                                                             | 52%     | 1%                   | 5%       | 5%      | 0%                   | 56%         | 65%     | 2%                   |                  |         |                      |
| LU | 56%                                                             | 32%     | 0%                   | 6%       | 19%     | 0%                   | 83%         | 48%     | -1%                  | 8%               | 4%      | 0%                   |
| LV | 48%                                                             | 49%     | 0%                   | 10%      | 13%     | 0%                   | 83%         | 73%     | -1%                  | 0%               | 5%      | 0%                   |
| UK | 68%                                                             | 70%     | 3%                   |          |         |                      |             |         |                      | 31%              | 18%     | 0%                   |

The table shows mobility patterns of natives and second generation migrants that are dropped from the sample due to missing information on any of the explanatory variables used in the multivariate analysis in the paper. *Migrants* refers to the mobility of second generation migrants, *natives* refers to the mobility of natives. The *bias in mobility gap* is calculated as the difference between mobility gaps for the sample before dropping individuals with missing information on explanatory variables and mobility gaps in the final sample after dropping those individuals, which is used in the analyses in the paper. The bias in mobility gap indicates by how much larger or smaller the mobility gap detected in the data would be if those excluded observations were included in the multivariate analysis. Negative values for the bias in mobility gap indicate a downward bias, i.e. the identified mobility gaps would be larger (or less negative) than the ones reported in the multivariate analysis (migrants children would be relatively more mobile than reported), positive values indicate an upward bias, i.e. mobility gaps would be smaller (or more negative) than reported (i.e. migrants' children would be relatively less mobile than reported). Differences to table E.2 are due to rounding.
